# Supplementary material for: Searching for a technology-driven acute rheumatic fever test: the START study protocol
Source: PubMed Central journal article supplement — BMJ Open. 2021 Sep 15;11(9):e053720. doi: 10.1136/bmjopen-2021-053720 (PMC8444258; doi:10.1136/bmjopen-2021-053720), 2021-09-15

# BMJ Open

BMJ Open is committed to open peer review. As part of this commitment we make the peer review history of every article we publish publicly available.

When an article is published we post the peer reviewers' comments and the authors' responses online. We also post the versions of the paper that were used during peer review. These are the versions that the peer review comments apply to.

The versions of the paper that follow are the versions that were submitted during the peer review process. They are not the versions of record or the final published versions. They should not be cited or distributed as the published version of this manuscript.

BMJ Open is an open access journal and the full, final, typeset and author-corrected version of record of the manuscript is available on our site with no access controls, subscription charges or pay-per-view fees (<http://bmjopen.bmj.com>).

If you have any questions on BMJ Open's open peer review process please email [info.bmjopen@bmj.com](mailto:info.bmjopen@bmj.com)

# BMJ Open

## Searching for a Technology-Driven Acute Rheumatic Fever Test: the START study protocol

|                               |                                                                                                                                                                                                                                                                                                                                                                                                                                                                                                                                                                                                                                                                                                                                                                                                                                                                                                                                                                                                                                                                                                                                                                                                                                           |
|-------------------------------|-------------------------------------------------------------------------------------------------------------------------------------------------------------------------------------------------------------------------------------------------------------------------------------------------------------------------------------------------------------------------------------------------------------------------------------------------------------------------------------------------------------------------------------------------------------------------------------------------------------------------------------------------------------------------------------------------------------------------------------------------------------------------------------------------------------------------------------------------------------------------------------------------------------------------------------------------------------------------------------------------------------------------------------------------------------------------------------------------------------------------------------------------------------------------------------------------------------------------------------------|
| Journal:                      | <i>BMJ Open</i>                                                                                                                                                                                                                                                                                                                                                                                                                                                                                                                                                                                                                                                                                                                                                                                                                                                                                                                                                                                                                                                                                                                                                                                                                           |
| Manuscript ID                 | bmjopen-2021-053720                                                                                                                                                                                                                                                                                                                                                                                                                                                                                                                                                                                                                                                                                                                                                                                                                                                                                                                                                                                                                                                                                                                                                                                                                       |
| Article Type:                 | Protocol                                                                                                                                                                                                                                                                                                                                                                                                                                                                                                                                                                                                                                                                                                                                                                                                                                                                                                                                                                                                                                                                                                                                                                                                                                  |
| Date Submitted by the Author: | 25-May-2021                                                                                                                                                                                                                                                                                                                                                                                                                                                                                                                                                                                                                                                                                                                                                                                                                                                                                                                                                                                                                                                                                                                                                                                                                               |
| Complete List of Authors:     | Ralph, A; Charles Darwin University; Royal Darwin Hospital<br>Webb, Rachel; Counties Manukau District Health Board; Starship Children's Hospital<br>McGregor, Reuben; The University of Auckland<br>Lassmann, Timo; Telethon Kids Institute<br>Benothman, Rym; Telethon Kids Institute<br>Yan, Jennifer; Menzies School of Health Research, Charles Darwin University; Royal Darwin Hospital<br>Bennett, Julie; University of Otago<br>Wilson, Nigel; Starship Children's Hospital<br>Moreland, Nikki; The University of Auckland, School of Medical Sciences and Maurice Wilkins Centre<br>Bosco, Anthony; Telethon Kids Institute, The University of Western Australia<br>Broadhurst, David; Edith Cowan<br>Barnett, Timothy; Telethon Kids Institute, Wesfarmers Centre for Vaccines and Infectious Diseases<br>Remenyi, Bo; Menzies School of Health Research, Charles Darwin University, Global and Tropical Health Division; Royal Darwin Hospital, Paediatrics<br>Mayo, Mark; 1. Menzies School of Health Research, Charles Darwin University<br>Pearson, Glenn; Telethon Kids Institute, Aboriginal Health Institute Leadership Team<br>Kollmann, Tobias; Telethon Kids Institute<br>Carapetis, Jonathan; Telethon Kids Institute |
| Keywords:                     | Paediatric rheumatology < PAEDIATRICS, Valvular heart disease < CARDIOLOGY, Immunology < TROPICAL MEDICINE, Diagnostic microbiology < INFECTIOUS DISEASES                                                                                                                                                                                                                                                                                                                                                                                                                                                                                                                                                                                                                                                                                                                                                                                                                                                                                                                                                                                                                                                                                 |
|                               |                                                                                                                                                                                                                                                                                                                                                                                                                                                                                                                                                                                                                                                                                                                                                                                                                                                                                                                                                                                                                                                                                                                                                                                                                                           |

SCHOLARONE™  
Manuscripts

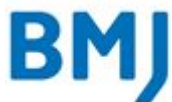

I, the Submitting Author has the right to grant and does grant on behalf of all authors of the Work (as defined in the below author licence), an exclusive licence and/or a non-exclusive licence for contributions from authors who are: i) UK Crown employees; ii) where BMJ has agreed a CC-BY licence shall apply, and/or iii) in accordance with the terms applicable for US Federal Government officers or employees acting as part of their official duties; on a worldwide, perpetual, irrevocable, royalty-free basis to BMJ Publishing Group Ltd ("BMJ") its licensees and where the relevant Journal is co-owned by BMJ to the co-owners of the Journal, to publish the Work in this journal and any other BMJ products and to exploit all rights, as set out in our [licence](#).

The Submitting Author accepts and understands that any supply made under these terms is made by BMJ to the Submitting Author unless you are acting as an employee on behalf of your employer or a postgraduate student of an affiliated institution which is paying any applicable article publishing charge ("APC") for Open Access articles. Where the Submitting Author wishes to make the Work available on an Open Access basis (and intends to pay the relevant APC), the terms of reuse of such Open Access shall be governed by a Creative Commons licence – details of these licences and which [Creative Commons](#) licence will apply to this Work are set out in our licence referred to above.

Other than as permitted in any relevant BMJ Author's Self Archiving Policies, I confirm this Work has not been accepted for publication elsewhere, is not being considered for publication elsewhere and does not duplicate material already published. I confirm all authors consent to publication of this Work and authorise the granting of this licence.

# Searching for a Technology-Driven Acute Rheumatic Fever Test: the START study protocol

## Authors

Anna P. Ralph<sup>1,2\*</sup>  
Rachel Webb<sup>3,4,5</sup>  
Nicole J. Moreland<sup>6</sup>  
Reuben McGregor<sup>6</sup>  
Anthony Bosco<sup>7</sup>  
David Broadhurst<sup>8</sup>  
Timo Lassmann<sup>7</sup>  
Timothy Barnett<sup>9</sup>  
Rym Benothman<sup>7</sup>  
Jennifer Yan<sup>1,2</sup>  
Bo Remenyi<sup>1,2</sup>  
Julie Bennett<sup>10</sup>  
Nigel Wilson<sup>4</sup>  
Mark Mayo<sup>1</sup>  
Glenn Pearson<sup>7</sup>  
Tobias Kollmann<sup>7</sup>  
Jonathan R. Carapetis<sup>7,11</sup>

1. Menzies School of Health Research, Charles Darwin University, Darwin, Northern Territory, Australia
2. Royal Darwin Hospital, Darwin, Northern Territory, Australia
3. KidzFirst Hospital, Counties Manukau District Health Board, Auckland, New Zealand
4. Starship Children's Hospital, Auckland, New Zealand
5. Department of Paediatrics; Child and youth Health, University of Auckland, Auckland, New Zealand
6. School of Medical Sciences and Maurice Wilkins Centre, The University of Auckland, Auckland New Zealand
7. Telethon Kids Institute, Perth, Western Australia; Perth Children's Hospital, Perth, WA.
8. Centre for Integrative Metabolomics & Computational Biology, Edith Cowan University, Perth, WA.
9. Wesfarmers Centre for Vaccines and Infectious Diseases, Telethon Kids Institute, University of Western Australia, Nedlands, WA, Australia.
10. University of Otago, Wellington, New Zealand
11. University of Western Australia, Perth, Western Australia.

\*corresponding author [anna.ralph@menzies.edu.au](mailto:anna.ralph@menzies.edu.au)

**Word count:** Abstract 295; Manuscript 4016

**Keywords:** Acute rheumatic fever; biomarker; transcriptomics; rheumatic heart disease

## 1 **Abstract**

### 3 **Introduction**

4 The absence of a diagnostic test for Acute Rheumatic Fever (ARF) is a major impediment om  
5 managing this serious childhood condition. ARF is an autoimmune condition triggered by  
6 infection with Group A *Streptococcus*. It is the precursor to rheumatic heart disease (RHD), a  
7 leading cause of health inequity and premature mortality for Indigenous peoples of Australia,  
8 New Zealand and internationally.

### 10 **Methods and Analysis**

11 ‘Searching for a Technology-Driven Acute Rheumatic Fever Test’ (START) is a biomarker  
12 discovery study that aims to detect and test a biomarker signature that distinguishes ARF  
13 cases from non-ARF, and use systems biology and serology to better understand ARF  
14 pathogenesis. Eligible participants with ARF diagnosed by an expert clinical panel according  
15 to the 2015 Revised Jones Criteria, aged 5-30 years, will be recruited from three hospitals in  
16 Australia and New Zealand. Age, sex and ethnicity-matched individuals who are healthy or  
17 have non-ARF acute diagnoses or RHD, will be recruited as controls. In the discovery cohort,  
18 blood samples collected at baseline, and during convalescence in a subset, will be  
19 interrogated by comprehensive profiling to generate possible diagnostic biomarker signatures.  
20 A biomarker validation cohort will subsequently be used to test promising combinations of  
21 biomarkers. By defining the first biomarker signatures able to discriminate between ARF and  
22 other clinical conditions, the START study has the potential to transform the approach to  
23 ARF diagnosis and RHD prevention.

24  
25 **Ethics and dissemination** The study has approval from the Northern Territory Department  
26 of Health and Menzies School of Health Research ethics committee and the New Zealand  
27 Health and Disability Ethics Committee. It will be conducted according to ethical standards  
28 for research involving Indigenous Australians and New Zealand Māori and Pacific Peoples.  
29 Indigenous investigators and governance groups will provide oversight of study processes  
30 and advise on cultural matters.

1  
2  
3 33 **Article summary**  
4  
5

6 35 **Strengths and limitations of this study.**  
7

- 8  
9 36 • START addresses a critically important health problem, acute rheumatic fever, which  
10 37 disproportionately affects global Indigenous populations and for which there is no  
11 38 diagnostic test nor effective treatment able to limit progression to rheumatic heart  
12 39 disease  
13  
14 40 • The large sample size recruited across international sites and the use of unbiased,  
15 41 comprehensive immune profiling will maximise the likelihood of being able to define  
16 42 a biomarker signature which can discriminate between ARF and other clinical  
17 43 conditions  
18  
19 44 • The most robust ‘gold standard’ rheumatic fever diagnostic process currently available  
20 45 will be used, comprising the revised 2015 Jones Criteria applied by an expert clinical  
21 46 panel  
22  
23 47 • Culturally safe processes with Indigenous governance guide the development and  
24 48 conduct of the study  
25  
26 49 • An inherent limitation is heterogeneity among people with ARF with regards to  
27 50 demographic factors, ARF type (first or recurrent), diagnostic category (possible,  
28 51 probable, definite), clinical phenotype (carditis, chorea, arthritis, skin and soft tissue)  
29 52 and timing in relation to ARF onset (variable time taken for healthcare to be reached  
30 53 after disease onset, consent gained and blood samples collected)  
31  
32  
33  
34  
35  
36  
37  
38  
39  
40 54  
41  
42  
43  
44  
45  
46  
47  
48  
49  
50  
51  
52  
53  
54  
55  
56  
57  
58  
59  
60

## 56 Introduction

57  
58 The absence of a diagnostic test for acute rheumatic fever (ARF) is a major impediment to  
59 management and epidemiological understanding of this serious childhood condition. ARF is  
60 one of the best examples of human autoimmunity caused by an infection, with Group A  
61 *Streptococcus* (GAS) the identified trigger. It is the precursor to rheumatic heart disease  
62 (RHD), a leading cause of health inequity and premature mortality for Indigenous peoples of  
63 Australia, New Zealand and internationally<sup>1</sup>. Prompt diagnosis of ARF allows timely  
64 commencement of secondary prophylaxis with long-acting penicillin to prevent repeated GAS  
65 infections that drive ARF recurrences. ARF recurrences are in turn the main mechanism  
66 responsible for development of RHD. Under-diagnosis of ARF appears to be a major  
67 contributor to the high rates of RHD in Aboriginal communities in Australia's Northern  
68 Territory (NT), where 76% of patients with RHD lack a prior ARF diagnosis<sup>2</sup>. Similarly a  
69 cohort study in New Zealand (NZ) found the majority of RHD cases (65%) had never been  
70 previously hospitalised with ARF<sup>3</sup>. Similar findings are reported in African countries.<sup>4</sup>

71  
72 The Jones Criteria (Table 1) have been the diagnostic tool for ARF for nearly 80 years<sup>5</sup>. This  
73 is a regularly-reviewed clinical algorithm, now available in a user-friendly smart device  
74 application ('app')<sup>6</sup>, most recently modified to optimise sensitivity for use in high-risk settings  
75 and optimise specificity for low-risk populations<sup>7</sup>. Despite these revisions, ARF diagnosis  
76 remains challenging and subjective. Diagnostic biomarkers for ARF that improve the  
77 performance of these criteria or provide a definitive diagnostic test would be a major advance  
78 in improving ARF detection, and thereby, RHD prevention.<sup>8</sup> Accurate case ascertainment is  
79 also needed to monitor progress towards disease control targets.

80  
81 A further barrier to ARF management is the absence of an identified effective  
82 immunomodulatory treatment to alter long-term cardiac outcomes. Non-steroidal anti-  
83 inflammatory drugs alleviate joint symptoms but do not alter the long-term disease trajectory.  
84 Corticosteroids appear ineffective in limiting development or severity of RHD<sup>9</sup>, but in some  
85 settings are prescribed as a treatment of last resort for severe carditis<sup>10,11</sup>. Hydroxychloroquine  
86 use has recently been reported in two cases of ARF with carditis, based on plausible *in vitro*  
87 data<sup>12</sup> but efficacy is as yet unknown<sup>13</sup>. Improved knowledge of ARF immune pathogenesis is  
88 needed to inform potential immune modulatory strategies targeted to the immune pathology.

1  
2 89 Compounding complexity, different pathological processes may occur, accounting for the  
3 90 heterogeneous clinical phenotypes of ARF (Table 1, see major manifestations).  
4  
5

6 91  
7  
8 92 Most investigations into the immune basis of ARF have used biased (directed) approaches,  
9 93 with limited utility. For example, elevated TNF $\alpha$ , IL-6 and IL-8 have been reported in patients  
10 94 with active ARF and RHD, but are unreliable disease markers<sup>14-16</sup>. In difficult-to-diagnose  
11 95 diseases, the use of a multiplicity of biomarkers ('multivariate') to identify the presence or  
12 96 progression of disease has proven useful. Using micro-arrays, characteristic gene expression  
13 97 signatures have been reported in white blood cells from patients with Kawasaki disease  
14 98 (another inflammatory cardiac condition), lupus and tuberculosis demonstrating that  
15 99 multivariate expression profiling has potential to identify biomarker composite signatures as  
16 100 diagnostic tools<sup>17-20</sup>. Multivariate approaches to analysing biomarkers in sera or plasma have  
17 101 also shown promise. In a bead-based multiplex assay, a number of *M. tuberculosis*-reactive  
18 102 antibodies were successfully used to diagnose tuberculosis in non-human primates<sup>21</sup>, and  
19 103 antibody glycosylation patterns can discriminate latent from active TB in humans<sup>22</sup>. Most  
20 104 importantly, our recent studies show proof-of-principle for immunopathogenesis studies to  
21 105 understand ARF, identifying a dysregulated cytokine axis using multivariate approaches  
22 106 including RNAseq and flow cytometry<sup>12</sup> as well as a linked IgG3-C4 response in early ARF  
23 107 with multiplex bead-based assays<sup>23</sup>. Serum- and plasma-borne biomarkers in addition to  
24 108 transcriptional profiling and circulating cellular components thus constitute a strong and  
25 109 accessible means of diagnosis once useful biomarkers have been identified.  
26  
27  
28  
29  
30  
31  
32  
33  
34  
35  
36  
37  
38

39 110  
40  
41 111 Our hypothesis is that unbiased, multivariate analyses hold the greatest potential for identifying  
42 112 meaningful, translatable information on the immunopathogenesis of ARF. The aims of the  
43 113 'Searching for a Technology-Driven Acute Rheumatic Fever Test' (START) study are to  
44 114 determine whether this approach can identify a biomarker signature that accurately classifies  
45 115 ARF diagnoses according to a defined 'gold standard' diagnosis (the 2015 revised Jones  
46 116 Criteria applied by a panel of clinical experts), and to better understand ARF immune  
47 117 pathogenesis (Table 2). Specifically, we aim to develop, in a discovery cohort and validate in  
48 118 a second cohort, a profile of metabolic and immunological biomarkers that distinguishes ARF  
49 119 cases from a range of non-ARF conditions and healthy controls.  
50  
51  
52  
53  
54  
55

56 120

## 57 121 **Methods**

58  
59  
60



122

**Design**

START is a cross-national, prospective, observational study with a quasi case-control design. We will prospectively recruit children and young adults with ARF, and people matched on age, sex and ethnicity who have eligible control diagnoses, in Australia and NZ. The study will comprise a discovery cohort (up to 65 definite cases and 65 controls) and a validation cohort (up to 25 definite cases and 65 controls). Probable and possible ARF diagnoses will then be tested independently (Figure 1). Eligible control conditions are shown in Table 2. Participants will have blood collected for comprehensive immune profiling.

**Ethics and dissemination**

The study has approval from the NT Department of Health and Menzies School of Health Research ethics committee (18/3126) and the NZ Health and Disability Ethics Committee (18/CEN/197). It will be conducted according to Good Clinical Practice, Good Laboratory Practice and the National Health and Medical Research Council and ethical standards for research involving Indigenous Australians and NZ Māori and Pacific Peoples.

Knowledge dissemination will be through academic channels and community discussion forums. The study team is well placed to foster translation of findings into practical tools, namely, an improved diagnostic, and immunomodulatory therapy.

**Study sites**

Participating hospitals across the two international sites: Royal Darwin Hospital, Darwin, NT, Australia, and Starship and Middlemore Hospitals, Auckland, NZ. Clinical guidelines at all three study sites require that all people with suspected ARF are hospitalised for diagnostic workup and initiation of management<sup>10,24</sup>. Royal Darwin Hospital is the major tertiary referral hospital in Australia's NT. Thirty percent of the NT population is Indigenous (Aboriginal or Torres Strait Islander)<sup>25</sup>. ARF occurs at rates >300/100,000 total Aboriginal population in highest-burden communities in the NT<sup>26</sup>. Starship and Middlemore Hospitals serve a combined urban population of approximately 1.1 million people in the Auckland region. Māori and Pacific peoples make up approximately 27% of the population of greater Auckland region, where the incidence of ARF among Māori and Pacific children is approximately 33/100,000 and 93/100,000, respectively, for those 5–15 years old<sup>24,27</sup>.

155

## 156 **Study Participants**

157 Inclusion criteria for ARF cases are: individuals with suspected or confirmed ARF (the vast  
158 majority of whom are expected to identify as being of Aboriginal, Torres Strait Islander, Māori  
159 or Pacific ethnicity) aged 5-30 years (Darwin) or 2-20 years (NZ). Written, informed consent  
160 will be obtained from guardians or the participant themselves if aged  $\geq 16$  years in NZ or  $\geq 18$   
161 years in Australia. Differences between sites are consistent with local epidemiology and local  
162 ethical recommendations.

163

164 Exclusion criteria comprise individuals with severe anaemia in whom collection of the blood  
165 volume required for the study collection would be relatively contraindicated; profound  
166 immunosuppression other than corticosteroids for two months prior to study entry, or as  
167 appropriate depending on the half-life of the immunosuppressive agent; and unstable social  
168 situation precluding discussion about consent for research.

169

170 Controls are recruited into one of four groups: A. Non-ARF Streptococcal infections; B. Other  
171 non-ARF acute inflammatory presentations; C. Established RHD without an intercurrent acute  
172 diagnosis; and D. Healthy individuals (Table 2). All must meet the above-stated age, ethnicity  
173 and consent inclusion criteria and none of the exclusion criteria. Controls will be matched at  
174 data analysis stage to cases by site on sex, age within 10 years, and ethnicity. Individuals in  
175 Groups A, B and D will have an echocardiogram to exclude underlying RHD.

176

## 177 **Cultural safety**

178 Cultural safety<sup>28</sup> is a core underpinning principle of the study. In NZ, the research is conducted  
179 in accordance with core Te Tiriti o Waitangi principles affording protection, participation and  
180 partnership for Māori participants. Research staff enrolling participants will engage appropriate  
181 family members (in NZ: whānau) and respect differences in decision-making processes.  
182 Interpreters and translated participant materials will be used where study participants and their  
183 families primarily speak another language. In Darwin, patient information has been recorded  
184 in six Aboriginal languages. In NZ, participant materials have been translated into Te Reo  
185 Māori, Samoan and Tongan.

186

## 187 **Patient and Public Involvement**

188 The Indigenous investigators and collaborators at each site form governance groups to provide  
189 oversight of study design, conduct, reporting and dissemination. Patient and public

1  
2 190 involvement, drawing on our established consumer networks, will support knowledge  
3 191 dissemination.

4  
5 192

### 6 193 **Enrolment**

7  
8 194 It will be made clear that participation is voluntary and any benefits of participation are to  
9 195 society through knowledge advancement, rather than to the individual. Participants will be  
10 196 advised that wherever possible, blood collection for the study will coincide with collection  
11 197 done for clinical purposes, to avoid extra venepunctures. If a participant or their  
12 198 parent/guardian withdraws consent, no further samples will be collected unless a new consent  
13 199 form is signed. Participants are asked whether their blood may be stored for future use.

14  
15 200

16 201 People with suspected ARF will be enrolled as early as possible during admission, prior to a  
17 202 final diagnosis being assigned, to ensure that an acute sample is collected. A final diagnosis  
18 203 will be assigned once all required diagnostic information has become available. Participants in  
19 204 Group C (RHD) may additionally be recruited through outpatient clinics. Group D (healthy)  
20 205 will be sought from among family members and friends of other enrolled participants, or  
21 206 healthy members of the community in Darwin.

22  
23 207

### 24 208 **Clinical data collection**

25 209 After assigning a sequential study code, clinical details will be recorded on a paper Case Report  
26 210 Form (CRF) then entered into an electronic database (Medrio™ Electronic Data Capture  
27 211 System), including: date of illness onset, date of blood sample collection, demographics,  
28 212 clinical presentation, Jones criteria, clinical laboratory results, medications received and  
29 213 diagnosis assigned by the clinical treating team.

30  
31 214

### 32 215 **Assignment of diagnosis**

33 216 Patients presenting with suspected ARF may have a final diagnosis of definite ARF, probable  
34 217 ARF, possible ARF or a non-ARF condition. *Probable ARF* is defined in Australian guidelines  
35 218 as an acute presentation not fulfilling criteria, missing a major or minor criterion or lacking  
36 219 evidence of preceding streptococcal infection, but ARF is still considered the most likely  
37 220 diagnosis. *Possible ARF* applies to the same presentation type, but where ARF is considered  
38 221 uncertain but cannot be ruled out<sup>10</sup>. For this study, participants ultimately diagnosed with a non-  
39 222 ARF condition will be allocated by the clinical panel as group A or B controls.

40  
41 223

1  
2  
3 224 Management will be directed by treating clinicians. Clinical diagnoses will be assigned  
4 225 according to local Australian and NZ Diagnostic Criteria by a panel of  $\geq 2$  study clinicians  
5  
6 226 expert in ARF. The decision on diagnostic category requires clinical judgement, after  
7  
8 227 evaluating all aspects of the case. The Jones criteria app<sup>6</sup> which provides a result of definite,  
9  
10 228 probable or possible ARF or not ARF depending on information provided to the algorithm,  
11 229 will be used by the panel at their discretion. The diagnosis of carditis will be made if rheumatic  
12  
13 230 valvulitis is evident on echocardiogram as per Jones criteria. The diagnosis of rheumatic heart  
14  
15 231 disease will be made in accordance with features described by the World Heart Federation<sup>29</sup>.  
16 232 The 2015 revised Jones Criteria<sup>7,30</sup> will be applied as the gold standard diagnostic for definite  
17  
18 233 ARF. This represents a departure from normal practice in NZ where local diagnostic criteria  
19  
20 234 differ: polyarthralgia is not considered a major criterion in NZ<sup>24</sup>. In addition to the Jones  
21  
22 235 criteria, comprehensive clinical and laboratory information such as results of synovial fluid  
23  
24 236 testing, serology for alternative infectious aetiologies, autoantibodies, radiological findings,  
25  
26 237 diagnosis assigned by the treating team, family history and local epidemiology, will be  
27  
28 238 considered in adjudicating the diagnosis. ARF type will be further specified as initial episode  
29  
30 239 or recurrence. Where the adjudication panel's diagnosis differs from that of the treating team  
31  
32 240 with implications for management, this will be communicated to the treating specialist. The  
33  
34 241 clinical panel will also assign final diagnoses for controls.

242

### 243 **Blood collection**

37 244 Blood will be collected at baseline, and for patients with ARF, on follow-up occasions during  
38  
39 245 the convalescent period as able e.g. during prolonged hospitalisation or at a later outpatient  
40  
41 246 appointment (Table 3). A safe maximum volume of 28.5 mL depending on age will be obtained  
42  
43 247 in Australia<sup>31</sup>, and 14.5 mL in NZ. Baseline samples will be collected as soon as possible during  
44  
45 248 the acute presentation, timed to coincide with routine blood testing wherever possible.  
46  
47 249 Convalescent samples will be used to determine persistence and decay of immunopathological  
48  
49 250 signatures post ARF. After collection, samples will be transported immediately to research  
50  
51 251 laboratories at Menzies School of Health Research (Australia) or the University of Auckland  
52  
53 252 (NZ) for centrifugation, serum/plasma separation and viable peripheral blood mononuclear cell  
54  
55 253 (PBMC) preparation. Timely freezing and storage of serum/plasma aliquots, PAXgene tubes  
56  
57 254 at  $-80^{\circ}\text{C}$  and PBMCs in gas-phase liquid nitrogen. Samples will be shipped periodically to  
58  
59 255 relevant laboratories.

256

### 257 **Sample size**

1  
2 258 It is not possible to predict *a priori* the combined discriminatory ability of independently  
3  
4 259 measured factors. This study has elected to enrol up to 120 ARF cases (comprising  
5  
6 260 approximately 90 definite ARF, 15 probable, 15 possible) and 130 controls (30 each of control  
7  
8 261 groups A, B and C, and 40 control group D; Figure 1 and Table 2). These numbers are feasible  
9  
10 262 and should enable characterisation of different ARF clinical phenotypes (carditis, arthritis,  
11 263 chorea, skin/soft tissue manifestations or a combination of these) and phases (first or recurrent  
12  
13 264 episodes), acknowledging heterogeneity among participants (ethnicity, age, sex; on  
14  
15 265 corticosteroids or not; at different stages of illness).

266

17  
18 267 In the multivariate approach it is expected that most, if not all, of the influential factors in the  
19  
20 268 optimal model will be significant ( $p < 0.05$ ) in univariate testing. Assuming  $\alpha$  of 5% and 95%  
21  
22 269 power ( $\beta = 0.05$ ) the minimum sample size is 26 cases. These calculations are only a guideline  
23  
24 270 for removing clear false positives, as the standard procedure for producing robust screening  
25  
26 271 models is to have a separate blinded analysis of a test subset of samples. We will utilise  
27  
28 272 Discovery and Validation Cohorts, together with stratified bootstrap cross-validation to  
29  
30 273 internally optimize the structural parameters in each model. We further used the standard  
31  
32 274 inferential approach to sample size estimation in diagnostic test studies of biomedical  
33  
34 275 informatics<sup>32</sup>. An effective multivariate predictor of ARF with positive predictive value of 0.8  
35  
36 276 (clinically useful), and a 95% confidence interval of  $\pm 0.1$ , would require 65 ARF cases in  
37  
38 277 the discovery cohort.

278

39 279 The discovery cohort will therefore comprise a target of 65 definite ARF cases and 65 controls.  
40  
41 280 The validation cohort will comprise a target of 25 definite ARF cases and 65 controls. Probable  
42  
43 281 and possible diagnoses ( $\sim 15$  in each group) will be tested independently (Figure 1). Cases will  
44  
45 282 be allocated to the discovery or validation cohorts using a computer-generated random  
46  
47 283 selection of unique study identification numbers.

284

### 285 **Laboratory methods**

50 286 The overarching aim is to develop and validate a profile of host related biomarkers that  
51  
52 287 distinguishes ARF cases from non-ARF conditions and healthy controls. This will be achieved  
53  
54 288 through the following analyses on peripheral blood samples.

289

### 290 **Immunophenotyping:**

1  
2 291 PBMC will be stained with labeled antibody panels to identify specific cell populations. Flow  
3  
4 292 cytometry raw data will be analyzed manually using Flowjo software and via an automated  
5  
6 293 gating platform as described<sup>33,34</sup>. Such high throughput, automated analysis of big flow  
7  
8 294 cytometry data offers several advantages over manual gating, including increased throughput  
9  
10 295 while increasing quality control (such as pre-processing removal of anomalous events via the  
11  
12 296 flowCut algorithm), and identification of specific cell populations with up to 50-dimensional  
13  
14 297 datasets<sup>34-36</sup>. Plasma samples will be analyzed utilizing multiplex cytokine assays to quantify  
15  
16 298 cytokine and chemokine plasma concentrations, detailed elsewhere<sup>33,37-39</sup>.

16 299

### 17 300 ***Metabolome analyses:***

18  
19 301 Untargeted metabolomic profiling (>1000 metabolites) will be performed on plasma samples  
20  
21 302 using liquid chromatography coupled to high resolution mass-spectrometry (LC-HRMS). Data  
22  
23 303 will be acquired using three modes of operation: reverse-phase/UPLC-MS/MS with positive  
24  
25 304 ion mode electrospray ionization (ESI), reverse-phase/UPLC-MS/MS with negative ion mode  
26  
27 305 ESI, and HILIC/UPLC-MS/MS with negative ion mode ESI. All identified metabolites will be  
28  
29 306 annotated using appropriate orthogonal analytical techniques applied to the metabolite of  
30  
31 307 interest against a chemical reference standard.

31 308

### 32 309 ***Blood Transcriptomics:***

33  
34 310 RNA will be extracted from stabilized whole blood samples (PAXgene tubes) as described<sup>40,41</sup>,  
35  
36 311 libraries prepared (TruSeq Stranded Total RNA with Ribo-Zero Globin reduction, Illumina)  
37  
38 312 and NextGen sequencing undertaken (Illumina HiSeq2500, 50-bp single-end reads). Read  
39  
40 313 alignment and gene-level quantification (counts) will be performed using Hisat<sup>42</sup>. Negative  
41  
42 314 binomial models will be employed for differential expression analysis, with false discovery  
43  
44 315 rate control for multiple testing<sup>43</sup>. The analyses will be adjusted for batch effects and variations  
45  
46 316 in cellular composition, which will be estimated employing RUVSeq and CIBERSORT  
47  
48 317 respectively<sup>44,45</sup>. Genes will be mapped to blood transcriptional modules to provide a systems-  
49  
50 318 level view of the responses and reduce the dimensionality of the data<sup>46</sup>.

51 319

### 52 320 ***CD4 T cell transcriptomic responses to GAS:***

53  
54 321 A two-phased approach will be used to examine CD4 T cell responses to GAS. Firstly, PBMCs  
55  
56 322 from a subset of definite ARF cases and healthy controls will be cultured under a variety of  
57  
58 323 conditions to identify optimal conditions for the second phase. Cells will be harvested at  
59  
60 324 multiple time points post-stimulation (6h, 24h and 48h) with heat- and antibiotic-killed ARF-

1  
2 325 associated GAS strains<sup>12,47,48</sup> and a selection of candidate ARF antigens. Total RNA from  
3 326 PBMCs cultured under each condition will be profiled by RNA-Seq (Illumina 100bp paired-  
4 327 end reads, 20M reads), and culture supernatants will be examined by Luminex (Bio-Plex 48-  
5 328 plex Pro Human Cytokine Screening Panel) to identify optimal conditions for maximal  
6 329 discrimination of responses between cases and controls. In the second phase, an expanded set  
7 330 of ARF cases and controls for which PBMC samples are available will be examined following  
8 331 culture under the identified, optimal conditions. Gene expression patterns and cytokine  
9 332 production will be profiled by RNA-Seq and Luminex, as described above.  
10  
11  
12  
13  
14  
15  
16  
17

#### 18 334 ***Antibody analysis:***

19 335 For unbiased investigation of autoantibodies, selected sera will be screened against planer  
20 336 protein microarrays comprised of over 42,000 protein fragments representing some 19,000  
21 337 human proteins<sup>49</sup>. Protein fragments that are more significantly bound by autoantibodies in  
22 338 ARF compared to controls will be identified using a *P*-value of >0.05 and fold change of 2.0  
23 339 as cut-off. A suspension bead array will then be designed<sup>50</sup> comprised of up to 380 potential  
24 340 autoantigens to assess autoantigen reactivity in all sera. The bead-antigens will be selected  
25 341 based on the planar array results, previously completed screens using HuProt high-content  
26 342 protein arrays (McGregor *et al.*, submitted) that contain over 15,000 autoantigens<sup>51</sup>, and targets  
27 343 from the literature. Finally, candidate ARF autoantigens identified in the suspension bead-array  
28 344 will be orthogonally validated as individual antigens in ELISA or Luminex bead-based assays  
29 345 to determine sensitivity and specificity.  
30  
31  
32  
33  
34  
35  
36  
37  
38  
39

#### 40 347 ***Bioinformatics and statistical analyses:***

41 348 The data collected for each patient across the immune phenotyping, transcriptomic, proteomic  
42 349 and metabolomic technologies will be integrated computationally to identify patterns of  
43 350 covariance within and between designated clinical outcome groups. Convergence of signatures  
44 351 across diverse systems biology domains will provide independent functional validation. The  
45 352 use of “multi-omic” data integration techniques will also enable the possibility of deriving  
46 353 novel biological information that will not be revealed in a single dataset alone.  
47  
48  
49  
50  
51  
52  
53

54 355 Data integration methods applying different computational strategies will be used to explore  
55 356 the complex covariance structure within and between the multi-omic data blocks. Initially,  
56 357 analysis will focus on each data block in isolation employing a combination of classical  
57 358 generalised linear modelling (GLM), multivariate projection regression models (PCA, PLS-  
58  
59  
60

1  
2 359 DA) and unsupervised cluster analysis. The multiple blocks will then be integrated into a single  
3  
4 360 computational model to enable multi-omic functional mapping, which in turn will allow us to  
5  
6 361 uncover the underlying biochemical mechanisms. Several methods for performing multi-block  
7  
8 362 data integration will be investigated, from which a consensus model will be derived. These will  
9  
10 363 include: protein–protein interaction networks using NetworkAnalyst<sup>52</sup>, Multi-block  
11  
12 364 Component Analysis<sup>53</sup>, regularized Canonical Correlation Analysis<sup>54</sup>, the Data Integration  
13  
14 365 Analysis for Biomarker discovery using Latent cOmponent (DIABLO) framework<sup>55</sup> and  
15  
16 366 Similarity Network Fusion<sup>56</sup>.

16 367  
17  
18 368 This systems biology analysis should result in both a domain-specific and domain-integrative  
19  
20 369 summary of biological phenomena that are associated with clinical outcome. Likely outcomes  
21  
22 370 are a signature biological pathway associated with ARF as well as individual candidate markers  
23  
24 371 that may provide the basis for the development of novel diagnostic tests. Furthermore, the data  
25  
26 372 generated through this effort will allow crisply defined power calculations for future narrowly  
27  
28 373 targeted assessment of potential biomarkers in clinical trials.

28 374  
29  
30 375  
31  
32 376

## 33 377 **Discussion**

35 378 We anticipate that study findings will provide the most comprehensive knowledge of the  
36  
37 379 immunopathogenesis of ARF to date, be used as the basis for development of a diagnostic test  
38  
39 380 and provide a pathway towards development of targeted immunomodulatory treatment(s).  
40  
41 381 START commenced recruitment in Australia in November 2018 and in NZ in May 2019.  
42  
43 382 Anticipated completion of recruitment is end-2021. Laboratory analyses will be batched and  
44  
45 383 run together at completion of recruitment.

46 384

47 385 Both under-and over-diagnosis of ARF pose major challenges to individuals and health  
48  
49 386 systems.<sup>10</sup> Whether the use of the ‘probable’ and ‘possible’ ARF diagnostic categories is  
50  
51 387 reducing underdiagnosis or contributing to overdiagnosis is currently unknown. Should  
52  
53 388 findings from this study successfully identify a discriminatory biomarker profile differentiating  
54  
55 389 definite ARF from non-ARF, this will provide a mechanism for accurate diagnosis to guide  
56  
57 390 appropriate management. This will be a critically important advance in the diagnosis and  
58  
59 391 management of ARF globally.

59 392  
60



1  
2 393 A minority of any population are at risk of ARF after exposure to group A streptococci. The  
3  
4 394 estimated lifetime cumulative incidence of ARF was previously calculated at 5.7% in  
5  
6 395 Australia's Northern Territory<sup>57</sup>. This was considered likely to be an under-estimate, and  
7  
8 396 indeed more recent data highlight the burden of unrecognised ARF in Aboriginal communities  
9  
10 397 in the NT where repeated infection with GAS is ubiquitous from early childhood<sup>2,58</sup>, suggesting  
11  
12 398 that the lifetime risk of ARF in these populations is higher than 6%. In US military camps, 2-  
13  
14 399 3% of recruits developed ARF after a single bout of streptococcal pharyngitis<sup>59</sup>.

15 400

16 401 Previous efforts to develop ARF diagnostic tests and elucidate the immunopathogenesis have  
17  
18 402 laid foundations for the START study design and analysis. In 2018, Kim *et al.* analysed  
19  
20 403 responses to GAS challenge of PBMC from ARF patients at Royal Darwin Hospital using  
21  
22 404 multiplex cytokine array, flow cytometric analysis, and global gene expression analysis by  
23  
24 405 RNA sequencing<sup>12</sup>. They identified a dysregulated interleukin-1 $\beta$ -granulocyte- macrophage  
25  
26 406 colony-stimulating factor (GM-CSF) cytokine axis in PBMCs from ARF patients, and the  
27  
28 407 potential to suppress this response by hydroxychloroquine. The authors proposed that  
29  
30 408 hydroxychloroquine, an immunomodulatory agent, could be repurposed to reduce the risk or  
31  
32 409 severity of RHD after ARF<sup>12</sup>. Clinical use of hydroxychloroquine, now reported as safe in two  
33  
34 410 cases<sup>13</sup>, requires further investigation. A study using sera from patients with ARF in NZ  
35  
36 411 combined multiplex bead-based assays and systems immunology data analysis to identify a  
37  
38 412 linked IgG3-C4 response that may have utility as a clinical biomarker in early ARF<sup>23</sup>. However,  
39  
40 413 small sample sizes have been a limiting factor. Key strengths of the current study include the  
41  
42 414 larger sample size, multicentre enrolment across different countries to maximise relevance, and  
43  
44 415 use of the latest laboratory approaches.

45 416

46 417 Limitations include that capture of eligible participants early in disease is challenging, due to  
47  
48 418 the variable time taken for participants to be hospitalised after disease onset, to identify and  
49  
50 419 gain consent from participants, and obtain blood samples. At the Australian site, the majority  
51  
52 420 of eligible participants will be Aboriginal children living in remote communities, often  
53  
54 421 hundreds of kilometres distant from the enrolment site. Although Auckland is a large urban  
55  
56 422 city inequitable healthcare access is experienced by many Māori and Pacific people living in  
57  
58 423 socio-economic deprivation and this can lead to delayed hospitalisation for many children  
59  
60 424 presenting with ARF. Given these inherent delays, a proportion of baseline blood samples will  
425  
426 be collected after the peak inflammatory phase has passed. Another limitation is heterogeneity  
among people with ARF with regards to ARF type (first or recurrent), diagnostic category

1  
2 427 (possible, probable, definite), clinical phenotype (carditis, chorea, arthritis etc) and  
3  
4 428 demographic variations; however, we limited enrolment to people below 30 years and only of  
5  
6 429 Aboriginal, Torres Strait Islander, Māori or Pacific ethnicity to minimize heterogeneity.  
7  
8 430 Although a distinguishing biomarker signature may be identified, the ability to readily translate  
9  
10 431 study findings into a feasible diagnostic able to be used in health service laboratories outside a  
11  
12 432 research environment, is uncertain.

13 433

14 434 Successful completion of this study will considerably improve knowledge of ARF  
15  
16 435 immunology. Innovative strategies to improve the clinical management of ARF are core  
17  
18 436 components of the overall suite of activities required to achieve the goal RHD elimination<sup>60</sup>.

1  
2  
3 438 **Acknowledgements:** We are very grateful to Caroline Motteram for project management,  
4 439 Yolanda Hernandez, Laura Francis and Vincent Mithen for recruiting participants in Darwin  
5 440 and Shirley Lawrence, Rhonda Holloway, Renee Clark, Alicia Stanley, and Roxanne Buchanan  
6 441 for recruiting participants in New Zealand. We thank Alex Kaethner and NT Cardiac for  
7 442 facilitating echocardiography. Vanessa Rigas, Erin Gargan, Gabriella Minigo and Michael  
8 443 Serralha are gratefully acknowledged for laboratory support; Kyran Kuzio, Tasha Cole, Alana  
9 444 Whitcombe, Lauren Carlton and Timothy Ho for laboratory assistance; Amy Baker and  
10 445 Rebecca Trowman for program and financial management.  
11 446

12  
13 447 **Authors' contributions:** JRC, APR, RW, NJM, AB, DB, TB, MM, GP, TK conceived  
14 448 and designed the study. NJM, RMG, AB, DB, TL, TB, RB, JB, TK will perform the assays and  
15 449 analyse the data. GP and MM provide project governance. APR, RW, JY, BR, NW and JRC  
16 450 provided clinical care, patient recruitment, assessment and clinical review panel participation.  
17 451 APR create the first draft and managed the edits to the manuscript. All authors reviewed and  
18 452 approved the study protocol.  
19 453

20  
21 454 **Funding statement:** The study is funded by the Australian National Health and Medical  
22 455 Research Council (NHMRC) grant #1147531. APR is supported by NHMRC fellowship  
23 456 #1142011. TCB is supported by the Western Australia Department of Health (#not applicable)  
24 457 and a Career Development Fellowship from Improving Health Outcomes in the Tropical North  
25 458 (NHMRC #1131932)  
26 459

27  
28  
29 460 **Competing interests statement.** The authors have no conflicts of interest to declare.  
30 461

31 462 **Data statement:** Not applicable. No data have been presented in this protocol paper.  
32  
33  
34  
35  
36  
37  
38  
39  
40  
41  
42  
43  
44  
45  
46  
47  
48  
49  
50  
51  
52  
53  
54  
55  
56  
57  
58  
59  
60

## Tables

### Table 1: Revised Jones Criteria

Legend: Reproduced with permission from *The 2020 Australian guideline for prevention, diagnosis and management of acute rheumatic fever and rheumatic heart disease (3rd edition)*[2]

|                                                                                          | High-risk groups†                                                                                                                                                                                                                                                                                                                                                                                                                                                                                                                                                                                                                              | Low-risk groups                                                                                                                                                             |
|------------------------------------------------------------------------------------------|------------------------------------------------------------------------------------------------------------------------------------------------------------------------------------------------------------------------------------------------------------------------------------------------------------------------------------------------------------------------------------------------------------------------------------------------------------------------------------------------------------------------------------------------------------------------------------------------------------------------------------------------|-----------------------------------------------------------------------------------------------------------------------------------------------------------------------------|
| Definite initial episode of ARF                                                          | 2 major manifestations + evidence of preceding GAS infection, OR<br>1 major + 2 minor manifestations + evidence of preceding GAS infection‡                                                                                                                                                                                                                                                                                                                                                                                                                                                                                                    |                                                                                                                                                                             |
| Definite recurrent § episode of ARF in a patient with a documented history of ARF or RHD | 2 major manifestations + evidence of preceding GAS infection, OR<br>1 major + 2 minor manifestations + evidence of preceding GAS infection‡, OR<br>3 minor manifestations + evidence of a preceding GAS infection‡                                                                                                                                                                                                                                                                                                                                                                                                                             |                                                                                                                                                                             |
| Probable or possible ARF (first episode or recurrence§)                                  | A clinical presentation in which ARF is considered a likely diagnosis but falls short in meeting the criteria by either: <ul style="list-style-type: none"> <li>• one major or one minor manifestation, OR</li> <li>• no evidence of preceding GAS infection (streptococcal titres within normal limits or titres not measured)</li> </ul> Such cases should be further categorised according to the level of confidence with which the diagnosis is made: <ul style="list-style-type: none"> <li>• Probable ARF (previously termed ‘probable: highly suspected’)</li> <li>• Possible ARF (previously termed ‘probable: uncertain’)</li> </ul> |                                                                                                                                                                             |
| Major manifestations                                                                     | Carditis (including subclinical evidence of rheumatic valvulitis on echocardiogram)<br>Polyarthritis¶ or aseptic monoarthritis or polyarthralgia<br>Sydenham chorea††<br>Erythema marginatum ‡‡<br>Subcutaneous nodules                                                                                                                                                                                                                                                                                                                                                                                                                        | Carditis (including subclinical evidence of rheumatic valvulitis on echocardiogram)<br>Polyarthritis¶<br>Sydenham chorea††<br>Erythema marginatum‡‡<br>Subcutaneous nodules |
| Minor Manifestations                                                                     | Fever §§ ≥38°C<br>Monoarthralgia ¶¶<br>ESR ≥30 mm/h or CRP ≥30 mg/L<br>Prolonged P-R interval on ECG†††                                                                                                                                                                                                                                                                                                                                                                                                                                                                                                                                        | Fever ≥38.5°C<br>Polyarthralgia or aseptic monoarthritis¶¶<br>ESR ≥60 mm/h or CRP ≥30 mg/L<br>Prolonged P-R interval on ECG†††                                              |

† High-risk groups are those living in communities with high rates of ARF (incidence >30/100,000 per year in 5–14-year-olds) or RHD (all-age prevalence >2/1000). Aboriginal and Torres Strait Islander peoples living in rural or remote settings are known to be at high risk. Data are not available for other populations but Aboriginal and Torres Strait Islander peoples living in urban settings, Māori and Pacific Islanders, and potentially immigrants from developing countries, may also be at high risk.

‡ Elevated or rising antistreptolysin O or other streptococcal antibody, or a positive throat culture or rapid antigen or nucleic acid test for GAS infection.

§ Recurrent definite, probable or possible ARF requires a time period of more than 90 days after the onset of symptoms from the previous episode of definite, probable or possible ARF

¶ A definite history of arthritis is sufficient to satisfy this manifestation. Note that if polyarthritis is present as a major manifestation, polyarthralgia or aseptic monoarthritis cannot be considered an additional minor manifestation in the same person.

†† Chorea does not require other manifestations or evidence of preceding GAS infection, provided other causes of chorea are excluded.

‡‡ Care should be taken not to label other rashes, particularly non-specific viral exanthems, as erythema marginatum.

§§ In high-risk groups, fever can be considered a minor manifestation based on a reliable history (in the absence of documented temperature) if anti-inflammatory medication has already been administered.

¶¶ If polyarthritis is present as a major criterion, monoarthritis or arthralgia cannot be considered an additional minor manifestation.

††† If carditis is present as a major manifestation, a prolonged P-R interval cannot be considered an additional minor manifestation.

CRP, C-reactive protein; ECG, electrocardiogram; ESR, erythrocyte sedimentation rate.

**Table 2: Control groups**

|                            |                                                                                                                                                                                                                                                                                                                                                                                                                                                                                                                                                                                                              |
|----------------------------|--------------------------------------------------------------------------------------------------------------------------------------------------------------------------------------------------------------------------------------------------------------------------------------------------------------------------------------------------------------------------------------------------------------------------------------------------------------------------------------------------------------------------------------------------------------------------------------------------------------|
| <b>Group A<br/>(n=50):</b> | <p>Non-ARF Streptococcal infections or toxin mediated condition or post-streptococcal condition</p> <p>Examples:</p> <ul style="list-style-type: none"> <li>- active infection with a proven or likely causative streptococcal organism (e.g. <math>\beta</math>- haemolytic streptococcus, <math>\alpha</math>-haemolytic streptococcus, <i>S. pneumoniae</i> etc) from sterile or non-sterile site</li> <li>- scarlet fever</li> <li>- acute post-streptococcal glomerulonephritis</li> </ul> <p>AND</p> <ul style="list-style-type: none"> <li>- No evidence of definite RHD on echocardiogram</li> </ul> |
| <b>Group B<br/>(n=50):</b> | <p>Other acute condition</p> <p>Examples:</p> <ul style="list-style-type: none"> <li>- inflammatory conditions, including autoimmune inflammatory conditions (e.g. lupus with arthritis), pancreatitis etc</li> <li>- infective condition: confirmed arboviral infection (eg Ross River virus), septic arthritis, bacterial endocarditis, etc</li> <li>- trauma requiring hospitalisation or operative procedure</li> </ul> <p>AND</p> <ul style="list-style-type: none"> <li>- No evidence of definite RHD on echocardiogram</li> </ul>                                                                     |
| <b>Group C<br/>(n=50):</b> | <p>RHD</p> <ul style="list-style-type: none"> <li>- Echocardiographically confirmed RHD with no active inflammation</li> </ul> <p>OR</p> <ul style="list-style-type: none"> <li>- past history of definite ARF but no current disease activity.</li> </ul>                                                                                                                                                                                                                                                                                                                                                   |
| <b>Group D<br/>(n=50):</b> | <p>Healthy</p> <ul style="list-style-type: none"> <li>- No intercurrent medical condition as determined by clinical questionnaire</li> <li>- Minor trauma allowed</li> </ul> <p>AND</p> <ul style="list-style-type: none"> <li>- No evidence of definite RHD on echocardiogram</li> </ul>                                                                                                                                                                                                                                                                                                                    |

**Table 3: Blood collection**

| <b>Australian recruitment site</b>                                  |                        |                   |                        |
|---------------------------------------------------------------------|------------------------|-------------------|------------------------|
|                                                                     | <b>Participant age</b> |                   | <b>Collection tube</b> |
| <b>Testing procedures</b>                                           | <b>5-9 years</b>       | <b>≥ 10 years</b> |                        |
| Transcriptional profiling                                           | 2.5mL                  | 2.5mL             | PaxGene tube           |
| Peripheral blood mononuclear cells for flow cytometry, Metabolomics | 4.0mL                  | 22.0mL            | Sodium Heparin         |
| Antibody studies                                                    | 4.0mL                  | 4.0mL             | Serum                  |
| <b>TOTAL</b>                                                        | 10.5mL                 | 28.5mL            |                        |
| <b>New Zealand recruitment sites</b>                                |                        |                   |                        |
|                                                                     | <b>Participant age</b> |                   | <b>Collection tube</b> |
| <b>Testing procedures</b>                                           | <b>2-10 years</b>      | <b>≥ 11 years</b> |                        |
| Transcriptional profiling                                           | 2.5mL                  | 2.5mL             | PaxGene tube           |
| Peripheral blood mononuclear cells for flow cytometry, Metabolomics | 4.0mL                  | 8.0mL             | Sodium Heparin         |
| Antibody studies                                                    | 4.0mL                  | 4.0mL             | Serum                  |
| <b>TOTAL</b>                                                        | 10.5mL                 | 14.5mL            |                        |

## References

1. Ralph AP, Read C, Johnston V, et al. Improving delivery of secondary prophylaxis for rheumatic heart disease in remote Indigenous communities: study protocol for a stepped-wedge randomised trial. *Trials* 2016;17(1):51. doi: 10.1186/s13063-016-1166-y
2. Hardie K, Ralph AP, de Dassel JL. RHD elimination: action needed beyond secondary prophylaxis. *Aust N Z J Public Health* 2020;44(5):427. doi: 10.1111/1753-6405.13002 [published Online First: 2020/06/09]
3. Oliver J, Robertson O, Zhang J, et al. Progression of Acute Rheumatic Fever to Recurrence, Rheumatic Heart Disease, and Death in New Zealand Children and Youth: A Cohort Study. *Heart, Lung and Circulation* 2019;28
4. Zuhlke L, Engel ME, Karthikeyan G, et al. Characteristics, complications, and gaps in evidence-based interventions in rheumatic heart disease: the Global Rheumatic Heart Disease Registry (the REMEDY study). *European heart journal* 2015;36(18):1115-22a. doi: 10.1093/eurheartj/ehu449
5. Jones TD. The diagnosis of rheumatic fever. *J Am Med Assoc* 1944;126:481-84.
6. RHD Australia. iPhone and Android Apps. <http://www.rhdaustralia.org.au/apps> 2020 [14 August 2014].
7. Gewitz MH, Baltimore RS, Tani LY, et al. Revision of the Jones Criteria for the diagnosis of acute rheumatic fever in the era of Doppler echocardiography: a scientific statement from the American Heart Association. *Circulation* 2015;131(20):1806-18. doi: 10.1161/CIR.0000000000000205
8. McMillan DJ, Rafeek RAM, Norton RE, et al. In Search of the Holy Grail: A Specific Diagnostic Test for Rheumatic Fever. *Front Cardiovasc Med* 2021;8:674805. doi: 10.3389/fcvm.2021.674805
9. Cilliers A, Adler AJ, Saloojee H. Anti-inflammatory treatment for carditis in acute rheumatic fever. *Cochrane database of systematic reviews* 2015(5):CD003176. doi: 10.1002/14651858.CD003176.pub3
10. RHD Australia (ARF/RHD writing group). The 2020 Australian guideline for prevention, diagnosis and management of acute rheumatic fever and rheumatic heart disease (3rd edition) <https://www.rhdaustralia.org.au/arf-rhd-guideline>. Menzies School of Health Research, 2020.
11. Dean GL, Edwards SG, Ives NJ, et al. Treatment of tuberculosis in HIV-infected persons in the era of highly active antiretroviral therapy. *Aids* 2002;16(1):75-83.
12. Kim ML, Martin WJ, Minigo G, et al. Dysregulated IL-1beta-GM-CSF Axis in Acute Rheumatic Fever That Is Limited by Hydroxychloroquine. *Circulation* 2018;138(23):2648-61. doi: 10.1161/CIRCULATIONAHA.118.033891 [published Online First: 2018/12/21]
13. Wilson NJ, Concannon A, Malcolm J, et al. The Treatment of Acute Rheumatic Fever: Novel Use of Hydroxychloroquine. *Pediatr Infect Dis J* 2020 doi: 10.1097/INF.0000000000002647 [published Online First: 2020/03/30]
14. M. Hafez M, EL-Morsy Z, EL-Shennawy F, et al. Susceptibility to Over Production of Cytokines in Acute Rheumatic Carditis and Their Role in the Pathogenesis. *Journal of Medical Sciences* 2002 doi: 10.3923/jms.2002.65.73
15. Yegin O, Coskun M, Ertug H. Cytokines in acute rheumatic fever. *Eur J Pediatr* 1997;156(1):25-9. doi: 10.1007/s004310050545 [published Online First: 1997/01/01]
16. Narin N, Kutukculer N, Narin F, et al. Anticardiolipin antibodies in acute rheumatic fever and chronic rheumatic heart disease: is there a significant association? *Clin Exp Rheumatol* 1996;14(5):567-9. [published Online First: 1996/09/01]

17. Wright VJ, Herberg JA, Kaforou M, et al. Diagnosis of Kawasaki Disease Using a Minimal Whole-Blood Gene Expression Signature. *JAMA Pediatr* 2018;172(10):e182293. doi: 10.1001/jamapediatrics.2018.2293 [published Online First: 2018/08/08]
18. Berry MP, Graham CM, McNab FW, et al. An interferon-inducible neutrophil-driven blood transcriptional signature in human tuberculosis. *Nature* 2010;466(7309):973-7. doi: 10.1038/nature09247 [published Online First: 2010/08/21]
19. Bennett L, Palucka AK, Arce E, et al. Interferon and granulopoiesis signatures in systemic lupus erythematosus blood. *J Exp Med* 2003;197(6):711-23. doi: 10.1084/jem.20021553 [published Online First: 2003/03/19]
20. Anderson ST, Kaforou M, Brent AJ, et al. Diagnosis of childhood tuberculosis and host RNA expression in Africa. *N Engl J Med* 2014;370(18):1712-23. doi: 10.1056/NEJMoa1303657
21. Khan IH, Ravindran R, Yee J, et al. Profiling antibodies to Mycobacterium tuberculosis by multiplex microbead suspension arrays for serodiagnosis of tuberculosis. *Clinical and vaccine immunology : CVI* 2008;15(3):433-8. doi: 10.1128/CVI.00354-07 [published Online First: 2007/12/14]
22. Lu LL, Chung AW, Rosebrock TR, et al. A Functional Role for Antibodies in Tuberculosis. *Cell* 2016;167(2):433-43 e14. doi: 10.1016/j.cell.2016.08.072 [published Online First: 2016/09/27]
23. Chung AW, Ho TK, Hanson-Manful P, et al. Systems immunology reveals a linked IgG3-C4 response in patients with acute rheumatic fever. *Immunol Cell Biol* 2020;98(1):12-21. doi: 10.1111/imcb.12298 [published Online First: 2019/11/20]
24. Heart Foundation of New Zealand. New Zealand Guidelines for Rheumatic Fever: Diagnosis, Management and Secondary Prevention of Acute Rheumatic Fever and Rheumatic Heart Disease: 2014 Update. <https://www.heartfoundation.org.nz/resources/acute-rheumatic-fever-and-rheumatic-heart-disease-guideline>, 2014.
25. Australian Bureau of Statistics. Estimates of Aboriginal and Torres Strait Islander Australians 2016 [Available from: <https://www.abs.gov.au/ausstats/abs@.nsf/mf/3238.0.55.001> accessed 27 April 2020.
26. Francis J, R, , Gargan C, Remenyi B, et al. A cluster of acute rheumatic fever cases among Aboriginal Australians in a remote community with high baseline incidence. *Aust N Z J Public Health* 2019;4(3):288-93.
27. Institute of Environmental Science and Research Limited. Rheumatic fever report, January-December 2018. EpiSurv Science for Communities [https://surv.esr.cri.nz/PDF\\_surveillance/RheumaticFever/Rheumaticfeverbi-annualreportJan-Dec2018.pdf](https://surv.esr.cri.nz/PDF_surveillance/RheumaticFever/Rheumaticfeverbi-annualreportJan-Dec2018.pdf). 2018
28. Curtis E, Jones R, Tipene-Leach D, et al. Why cultural safety rather than cultural competency is required to achieve health equity: a literature review and recommended definition. *International journal for equity in health* 2019;18(1):174.
29. Remenyi B, Wilson N, Steer A, et al. World Heart Federation criteria for echocardiographic diagnosis of rheumatic heart disease--an evidence-based guideline. *Nature reviews Cardiology* 2012;9(5):297-309. doi: 10.1038/nrcardio.2012.7
30. Beaton A, Carapetis J. The 2015 revision of the Jones criteria for the diagnosis of acute rheumatic fever: implications for practice in low-income and middle-income countries. *Heart Asia* 2015;7(2):7-11. doi: 10.1136/heartasia-2015-010648 [published Online First: 2015/01/01]
31. Seattle Children's Hospital. Maximum Allowable Blood Draw From Infants. Mayo Foundation for Medical Education and Research 2020 [28 April 2020]. Available from: <https://seattlechildrenslab.testcatalog.org/show/1000721-1>.



- 1
- 2
- 3 32. Hajian-Tilaki K. Sample size estimation in diagnostic test studies of biomedical
- 4 informatics. *J Biomed Inform* 2014;48:193-204. doi: 10.1016/j.jbi.2014.02.013
- 5 [published Online First: 2014/03/04]
- 6 33. Ben-Othman R, Cai B, Liu AC, et al. Systems Biology Methods Applied to Blood and
- 7 Tissue for a Comprehensive Analysis of Immune Response to Hepatitis B Vaccine in
- 8 Adults. *Frontiers in immunology* 2020;11:580373. doi: 10.3389/fimmu.2020.580373
- 9 [published Online First: 2020/12/01]
- 10 34. Rahim A, Meskas J, Drissler S, et al. High throughput automated analysis of big flow
- 11 cytometry data. *Methods* 2018;134-135:164-76. doi: 10.1016/j.ymeth.2017.12.015
- 12 [published Online First: 2017/12/31]
- 13 35. Malek M, Taghiyar MJ, Chong L, et al. flowDensity: reproducing manual gating of flow
- 14 cytometry data by automated density-based cell population identification.
- 15 *Bioinformatics* 2015;31(4):606-7. doi: 10.1093/bioinformatics/btu677 [published
- 16 Online First: 2014/11/08]
- 17 36. Ge Y, Sealfon SC. flowPeaks: a fast unsupervised clustering for flow cytometry data via
- 18 K-means and density peak finding. *Bioinformatics* 2012;28(15):2052-8. doi:
- 19 10.1093/bioinformatics/bts300 [published Online First: 2012/05/19]
- 20 37. Amenyogbe N, Dimitriu P, Cho P, et al. Innate Immune Responses and Gut Microbiomes
- 21 Distinguish HIV-Exposed from HIV-Unexposed Children in a Population-Specific
- 22 Manner. *J Immunol* 2020;205(10):2618-28. doi: 10.4049/jimmunol.2000040
- 23 [published Online First: 2020/10/18]
- 24 38. Amenyogbe N, Dimitriu P, Smolen KK, et al. Biogeography of the Relationship between
- 25 the Child Gut Microbiome and Innate Immune System. *mBio* 2021;12(1) doi:
- 26 10.1128/mBio.03079-20 [published Online First: 2021/01/14]
- 27 39. Moncunill G, Dobano C, Gonzalez R, et al. Association of Maternal Factors and HIV
- 28 Infection With Innate Cytokine Responses of Delivering Mothers and Newborns in
- 29 Mozambique. *Front Microbiol* 2020;11:1452. doi: 10.3389/fmicb.2020.01452
- 30 [published Online First: 2020/08/09]
- 31 40. Lee AH, Shannon CP, Amenyogbe N, et al. Dynamic molecular changes during the first
- 32 week of human life follow a robust developmental trajectory. *Nat Commun*
- 33 2019;10(1):1092. doi: 10.1038/s41467-019-08794-x [published Online First:
- 34 2019/03/14]
- 35 41. Idoko OT, Smolen KK, Wariri O, et al. Clinical Protocol for a Longitudinal Cohort Study
- 36 Employing Systems Biology to Identify Markers of Vaccine Immunogenicity in
- 37 Newborn Infants in The Gambia and Papua New Guinea. *Front Pediatr* 2020;8:197.
- 38 doi: 10.3389/fped.2020.00197 [published Online First: 2020/05/20]
- 39 42. Perteau M, Kim D, Perteau GM, et al. Transcript-level expression analysis of RNA-seq
- 40 experiments with HISAT, StringTie and Ballgown. *Nat Protoc* 2016;11(9):1650-67.
- 41 doi: 10.1038/nprot.2016.095 [published Online First: 2016/08/26]
- 42 43. Anders S, McCarthy DJ, Chen Y, et al. Count-based differential expression analysis of
- 43 RNA sequencing data using R and Bioconductor. *Nat Protoc* 2013;8(9):1765-86. doi:
- 44 10.1038/nprot.2013.099 [published Online First: 2013/08/27]
- 45 44. Risso D, Ngai J, Speed TP, et al. Normalization of RNA-seq data using factor analysis of
- 46 control genes or samples. *Nat Biotechnol* 2014;32(9):896-902. doi: 10.1038/nbt.2931
- 47 [published Online First: 2014/08/26]
- 48 45. Newman AM, Liu CL, Green MR, et al. Robust enumeration of cell subsets from tissue
- 49 expression profiles. *Nat Methods* 2015;12(5):453-7. doi: 10.1038/nmeth.3337
- 50 [published Online First: 2015/03/31]
- 51 46. Li S, Roupheal N, Duraisingham S, et al. Molecular signatures of antibody responses
- 52 derived from a systems biology study of five human vaccines. *Nat Immunol*
- 53 2014;15(2):195-204. doi: 10.1038/ni.2789 [published Online First: 2013/12/18]
- 54
- 55
- 56
- 57
- 58
- 59
- 60

- 1  
2  
3 47. Smoot JC, Barbian KD, Van Gompel JJ, et al. Genome sequence and comparative  
4 microarray analysis of serotype M18 group A Streptococcus strains associated with  
5 acute rheumatic fever outbreaks. *Proceedings of the National Academy of Sciences of*  
6 *the United States of America* 2002;99(7):4668-73. doi: 10.1073/pnas.062526099  
7 [published Online First: 2002/03/28]
- 8 48. Bryant PA, Smyth GK, Gooding T, et al. Susceptibility to acute rheumatic fever based on  
9 differential expression of genes involved in cytotoxicity, chemotaxis, and apoptosis.  
10 *Infect Immun* 2014;82(2):753-61. doi: 10.1128/IAI.01152-13 [published Online First:  
11 2014/01/31]
- 12 49. Sjoberg R, Mattsson C, Andersson E, et al. Exploration of high-density protein  
13 microarrays for antibody validation and autoimmunity profiling. *N Biotechnol*  
14 2016;33(5 Pt A):582-92. doi: 10.1016/j.nbt.2015.09.002 [published Online First:  
15 2015/09/30]
- 16 50. Just D, Manberg A, Mitsios N, et al. Exploring autoantibody signatures in brain tissue  
17 from patients with severe mental illness. *Transl Psychiatry* 2020;10(1):401. doi:  
18 10.1038/s41398-020-01079-8 [published Online First: 2020/11/20]
- 19 51. Pan J, Song G, Chen D, et al. Identification of Serological Biomarkers for Early  
20 Diagnosis of Lung Cancer Using a Protein Array-Based Approach. *Mol Cell*  
21 *Proteomics* 2017;16(12):2069-78. doi: 10.1074/mcp.RA117.000212 [published  
22 Online First: 2017/10/13]
- 23 52. Xia J, Gill EE, Hancock RE. NetworkAnalyst for statistical, visual and network-based  
24 meta-analysis of gene expression data. *Nat Protoc* 2015;10(6):823-44. doi:  
25 10.1038/nprot.2015.052 [published Online First: 2015/05/08]
- 26 53. De Roover K, Ceulemans E, Timmerman ME. How to perform multiblock component  
27 analysis in practice. *Behav Res Methods* 2012;44(1):41-56. doi: 10.3758/s13428-011-  
28 0129-1 [published Online First: 2011/07/13]
- 29 54. Wilms I, Croux C. Robust sparse canonical correlation analysis. *BMC Syst Biol*  
30 2016;10(1):72. doi: 10.1186/s12918-016-0317-9 [published Online First: 2016/08/16]
- 31 55. Singh A, Shannon CP, Gautier B, et al. DIABLO: an integrative approach for identifying  
32 key molecular drivers from multi-omics assays. *Bioinformatics* 2019;35(17):3055-62.  
33 doi: 10.1093/bioinformatics/bty1054 [published Online First: 2019/01/19]
- 34 56. Wang B, Mezlini AM, Demir F, et al. Similarity network fusion for aggregating data  
35 types on a genomic scale. *Nat Methods* 2014;11(3):333-7. doi: 10.1038/nmeth.2810  
36 [published Online First: 2014/01/28]
- 37 57. Carapetis JR, Currie BJ, Mathews JD. Cumulative incidence of rheumatic fever in an  
38 endemic region: a guide to the susceptibility of the population? *Epidemiol Infect*  
39 2000;124(2):239-44. [published Online First: 2000/05/17]
- 40 58. Francis JR, Fairhurst H, Hardefeldt H, et al. Hyperendemic rheumatic heart disease in a  
41 remote Australian town identified by echocardiographic screening. *Med J Aust*  
42 2020;213(3):118-23. doi: 10.5694/mja2.50682 [published Online First: 2020/07/08]
- 43 59. Rammelkamp CH, Wannamaker LW, Denny FW. The Epidemiology and Prevention of  
44 Rheumatic Fever. *Bull N Y Acad Med* 1952;28(5):321-34. [published Online First:  
45 1952/05/01]
- 46 60. Wyber R, Noonan K, Halkon C, et al. Ending rheumatic heart disease in Australia: the  
47 evidence for a new approach. *Med J Aust* 2020;213 Suppl 10:S3-S31. doi:  
48 10.5694/mja2.50853 [published Online First: 2020/11/16]
- 49  
50  
51  
52  
53  
54  
55  
56  
57  
58  
59  
60

1  
2  
3 **Figures**

4 **Figure 1: Study diagram showing target sample sizes**

5 ARF = acute rheumatic fever; RHD = rheumatic heart disease  
6  
7  
8  
9  
10  
11  
12  
13  
14  
15  
16  
17  
18  
19  
20  
21  
22  
23  
24  
25  
26  
27  
28  
29  
30  
31  
32  
33  
34  
35  
36  
37  
38  
39  
40  
41  
42  
43  
44  
45  
46  
47  
48  
49  
50  
51  
52  
53  
54  
55  
56  
57  
58  
59  
60

For peer review only

1  
2  
3  
4  
5  
6  
7  
8  
9  
10  
11  
12  
13  
14  
15  
16  
17  
18  
19  
20  
21  
22  
23  
24  
25  
26  
27  
28  
29  
30  
31  
32  
33  
34  
35  
36  
37  
38  
39  
40  
41  
42  
43  
44  
45  
46  
47  
48  
49  
50  
51  
52  
53  
54  
55  
56  
57  
58  
59  
60

ENROLMENT AND DIAGNOSIS

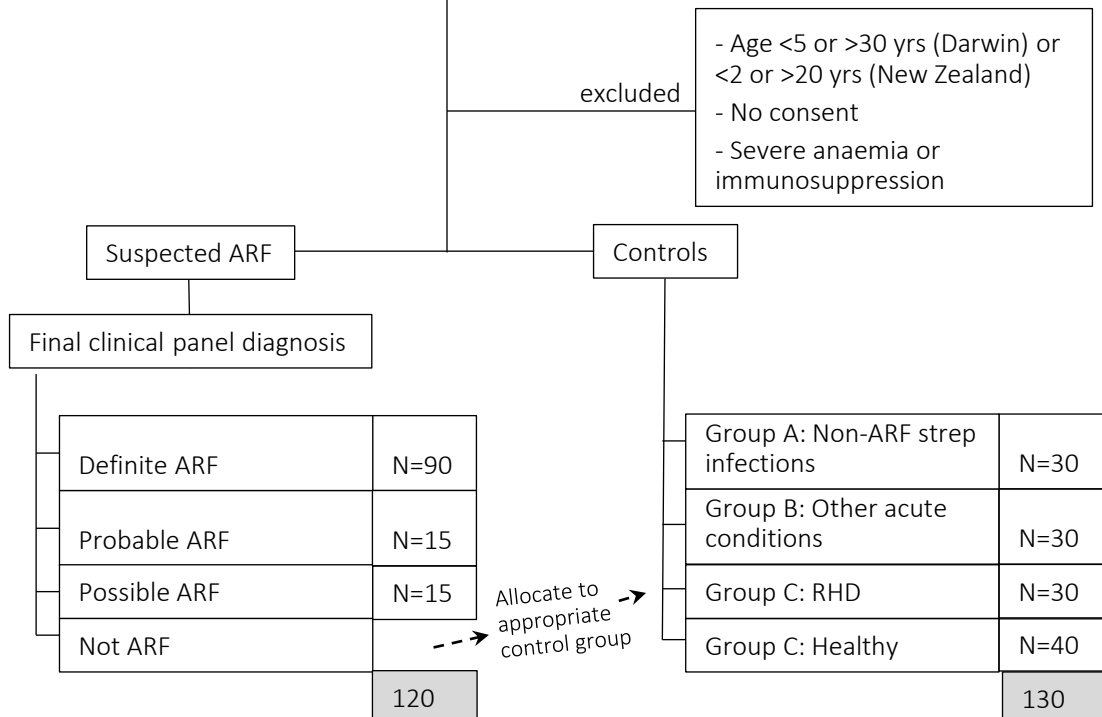

ANALYSES

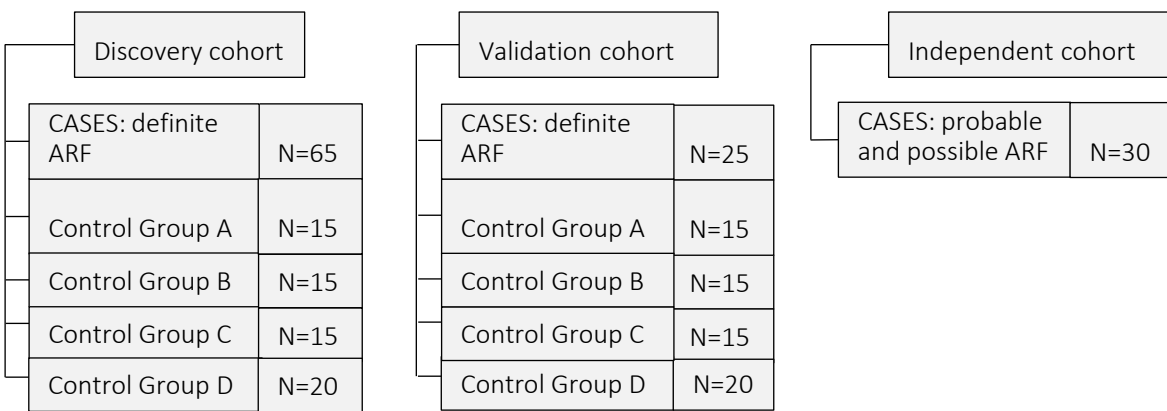

# BMJ Open

## Searching for a Technology-Driven Acute Rheumatic Fever Test: the START study protocol

|                                 |                                                                                                                                                                                                                                                                                                                                                                                                                                                                                                                                                                                                                                                                                                                                                                                                                                                                                                                                                                                                                                                                                                                                                                                                                                           |
|---------------------------------|-------------------------------------------------------------------------------------------------------------------------------------------------------------------------------------------------------------------------------------------------------------------------------------------------------------------------------------------------------------------------------------------------------------------------------------------------------------------------------------------------------------------------------------------------------------------------------------------------------------------------------------------------------------------------------------------------------------------------------------------------------------------------------------------------------------------------------------------------------------------------------------------------------------------------------------------------------------------------------------------------------------------------------------------------------------------------------------------------------------------------------------------------------------------------------------------------------------------------------------------|
| Journal:                        | <i>BMJ Open</i>                                                                                                                                                                                                                                                                                                                                                                                                                                                                                                                                                                                                                                                                                                                                                                                                                                                                                                                                                                                                                                                                                                                                                                                                                           |
| Manuscript ID                   | bmjopen-2021-053720.R1                                                                                                                                                                                                                                                                                                                                                                                                                                                                                                                                                                                                                                                                                                                                                                                                                                                                                                                                                                                                                                                                                                                                                                                                                    |
| Article Type:                   | Protocol                                                                                                                                                                                                                                                                                                                                                                                                                                                                                                                                                                                                                                                                                                                                                                                                                                                                                                                                                                                                                                                                                                                                                                                                                                  |
| Date Submitted by the Author:   | 04-Aug-2021                                                                                                                                                                                                                                                                                                                                                                                                                                                                                                                                                                                                                                                                                                                                                                                                                                                                                                                                                                                                                                                                                                                                                                                                                               |
| Complete List of Authors:       | Ralph, A; Charles Darwin University; Royal Darwin Hospital<br>Webb, Rachel; Counties Manukau District Health Board; Starship Children's Hospital<br>Moreland, Nikki; The University of Auckland, School of Medical Sciences and Maurice Wilkins Centre<br>McGregor, Reuben; The University of Auckland<br>Bosco, Anthony; Telethon Kids Institute, The University of Western Australia<br>Broadhurst, David; Edith Cowan<br>Lassmann, Timo; Telethon Kids Institute<br>Barnett, Timothy; Telethon Kids Institute, Wesfarmers Centre for Vaccines and Infectious Diseases<br>Benothman, Rym; Telethon Kids Institute<br>Yan, Jennifer; Menzies School of Health Research, Charles Darwin University; Royal Darwin Hospital<br>Remenyi, Bo; Menzies School of Health Research, Charles Darwin University, Global and Tropical Health Division; Royal Darwin Hospital, Paediatrics<br>Bennett, Julie; University of Otago<br>Wilson, Nigel; Starship Children's Hospital<br>Mayo, Mark; 1. Menzies School of Health Research, Charles Darwin University<br>Pearson, Glenn; Telethon Kids Institute, Aboriginal Health Institute Leadership Team<br>Kollmann, Tobias; Telethon Kids Institute<br>Carapetis, Jonathan; Telethon Kids Institute |
| <b>Primary Subject Heading</b>: | Global health                                                                                                                                                                                                                                                                                                                                                                                                                                                                                                                                                                                                                                                                                                                                                                                                                                                                                                                                                                                                                                                                                                                                                                                                                             |
| Secondary Subject Heading:      | Immunology (including allergy), Infectious diseases, Diagnostics                                                                                                                                                                                                                                                                                                                                                                                                                                                                                                                                                                                                                                                                                                                                                                                                                                                                                                                                                                                                                                                                                                                                                                          |
| Keywords:                       | Paediatric rheumatology < PAEDIATRICS, Valvular heart disease < CARDIOLOGY, Immunology < TROPICAL MEDICINE, Diagnostic microbiology < INFECTIOUS DISEASES                                                                                                                                                                                                                                                                                                                                                                                                                                                                                                                                                                                                                                                                                                                                                                                                                                                                                                                                                                                                                                                                                 |
|                                 |                                                                                                                                                                                                                                                                                                                                                                                                                                                                                                                                                                                                                                                                                                                                                                                                                                                                                                                                                                                                                                                                                                                                                                                                                                           |

1  
2  
3  
4  
5  
6  
7  
8  
9  
10  
11  
12  
13  
14  
15  
16  
17  
18  
19  
20  
21  
22  
23  
24  
25  
26  
27  
28  
29  
30  
31  
32  
33  
34  
35  
36  
37  
38  
39  
40  
41  
42  
43  
44  
45  
46  
47  
48  
49  
50  
51  
52  
53  
54  
55  
56  
57  
58  
59  
60

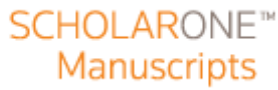

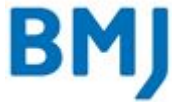

I, the Submitting Author has the right to grant and does grant on behalf of all authors of the Work (as defined in the below author licence), an exclusive licence and/or a non-exclusive licence for contributions from authors who are: i) UK Crown employees; ii) where BMJ has agreed a CC-BY licence shall apply, and/or iii) in accordance with the terms applicable for US Federal Government officers or employees acting as part of their official duties; on a worldwide, perpetual, irrevocable, royalty-free basis to BMJ Publishing Group Ltd ("BMJ") its licensees and where the relevant Journal is co-owned by BMJ to the co-owners of the Journal, to publish the Work in this journal and any other BMJ products and to exploit all rights, as set out in our [licence](#).

The Submitting Author accepts and understands that any supply made under these terms is made by BMJ to the Submitting Author unless you are acting as an employee on behalf of your employer or a postgraduate student of an affiliated institution which is paying any applicable article publishing charge ("APC") for Open Access articles. Where the Submitting Author wishes to make the Work available on an Open Access basis (and intends to pay the relevant APC), the terms of reuse of such Open Access shall be governed by a Creative Commons licence – details of these licences and which [Creative Commons](#) licence will apply to this Work are set out in our licence referred to above.

Other than as permitted in any relevant BMJ Author's Self Archiving Policies, I confirm this Work has not been accepted for publication elsewhere, is not being considered for publication elsewhere and does not duplicate material already published. I confirm all authors consent to publication of this Work and authorise the granting of this licence.

## Note from the Editors: Instructions for reviewers of study protocols

---

Since launching in 2011, BMJ Open has published study protocols for planned or ongoing research studies. If data collection is complete, we will not consider the manuscript.

Publishing study protocols enables researchers and funding bodies to stay up to date in their fields by providing exposure to research activity that may not otherwise be widely publicised. This can help prevent unnecessary duplication of work and will hopefully enable collaboration. Publishing protocols in full also makes available more information than is currently required by trial registries and increases transparency, making it easier for others (editors, reviewers and readers) to see and understand any deviations from the protocol that occur during the conduct of the study.

The scientific integrity and the credibility of the study data depend substantially on the study design and methodology, which is why the study protocol requires a thorough peer-review.

*BMJ Open* will consider for publication protocols for any study design, including observational studies and systematic reviews.

Some things to keep in mind when reviewing the study protocol:

- Protocol papers should report planned or ongoing studies. The dates of the study should be included in the manuscript.
- Unfortunately we are unable to customize the reviewer report form for study protocols. As such, some of the items (i.e., those pertaining to results) on the form should be scores as Not Applicable (N/A).
- While some baseline data can be presented, there should be no results or conclusions present in the study protocol.
- For studies that are ongoing, it is generally the case that very few changes can be made to the methodology. As such, requests for revisions are generally clarifications for the rationale or details relating to the methods. If there is a major flaw in the study that would prevent a sound interpretation of the data, we would expect the study protocol to be rejected.



# Searching for a Technology-Driven Acute Rheumatic Fever Test: the START study protocol

## Authors

Anna P. Ralph<sup>1,2\*</sup>  
Rachel Webb<sup>3,4,5</sup>  
Nicole J. Moreland<sup>6</sup>  
Reuben McGregor<sup>6</sup>  
Anthony Bosco<sup>7</sup>  
David Broadhurst<sup>8</sup>  
Timo Lassmann<sup>7</sup>  
Timothy Barnett<sup>9</sup>  
Rym Benothman<sup>7</sup>  
Jennifer Yan<sup>1,2</sup>  
Bo Remenyi<sup>1,2</sup>  
Julie Bennett<sup>10</sup>  
Nigel Wilson<sup>4</sup>  
Mark Mayo<sup>1</sup>  
Glenn Pearson<sup>7</sup>  
Tobias Kollmann<sup>7</sup>  
Jonathan R. Carapetis<sup>7,11</sup>

1. Menzies School of Health Research, Charles Darwin University, Darwin, Northern Territory, Australia
2. Royal Darwin Hospital, Darwin, Northern Territory, Australia
3. KidzFirst Hospital, Counties Manukau District Health Board, Auckland, New Zealand
4. Starship Children's Hospital, Auckland, New Zealand
5. Department of Paediatrics; Child and youth Health, University of Auckland, Auckland, New Zealand
6. School of Medical Sciences and Maurice Wilkins Centre, The University of Auckland, Auckland New Zealand
7. Telethon Kids Institute, Perth, Western Australia; Perth Children's Hospital, Perth, WA.
8. Centre for Integrative Metabolomics & Computational Biology, Edith Cowan University, Perth, WA.
9. Wesfarmers Centre for Vaccines and Infectious Diseases, Telethon Kids Institute, University of Western Australia, Nedlands, WA, Australia.
10. University of Otago, Wellington, New Zealand
11. University of Western Australia, Perth, Western Australia.

\*corresponding author [anna.ralph@menzies.edu.au](mailto:anna.ralph@menzies.edu.au)

**Word count:** Abstract 295; Manuscript 4016

**Keywords:** Acute rheumatic fever; biomarker; transcriptomics; rheumatic heart disease

## 1 **Abstract**

### 3 **Introduction**

4 The absence of a diagnostic test for Acute Rheumatic Fever (ARF) is a major impediment om  
5 managing this serious childhood condition. ARF is an autoimmune condition triggered by  
6 infection with Group A *Streptococcus*. It is the precursor to rheumatic heart disease (RHD), a  
7 leading cause of health inequity and premature mortality for Indigenous peoples of Australia,  
8 New Zealand and internationally.

### 10 **Methods and Analysis**

11 ‘Searching for a Technology-Driven Acute Rheumatic Fever Test’ (START) is a biomarker  
12 discovery study that aims to detect and test a biomarker signature that distinguishes ARF  
13 cases from non-ARF, and use systems biology and serology to better understand ARF  
14 pathogenesis. Eligible participants with ARF diagnosed by an expert clinical panel according  
15 to the 2015 Revised Jones Criteria, aged 5-30 years, will be recruited from three hospitals in  
16 Australia and New Zealand. Age, sex and ethnicity-matched individuals who are healthy or  
17 have non-ARF acute diagnoses or RHD, will be recruited as controls. In the discovery cohort,  
18 blood samples collected at baseline, and during convalescence in a subset, will be  
19 interrogated by comprehensive profiling to generate possible diagnostic biomarker signatures.  
20 A biomarker validation cohort will subsequently be used to test promising combinations of  
21 biomarkers. By defining the first biomarker signatures able to discriminate between ARF and  
22 other clinical conditions, the START study has the potential to transform the approach to  
23 ARF diagnosis and RHD prevention.

24  
25 **Ethics and dissemination** The study has approval from the Northern Territory Department  
26 of Health and Menzies School of Health Research ethics committee and the New Zealand  
27 Health and Disability Ethics Committee. It will be conducted according to ethical standards  
28 for research involving Indigenous Australians and New Zealand Māori and Pacific Peoples.  
29 Indigenous investigators and governance groups will provide oversight of study processes  
30 and advise on cultural matters.

1  
2  
3 33 **Article summary**  
4  
5

6 35 **Strengths and limitations of this study.**  
7

- 8  
9 36 • START addresses a critically important health problem, acute rheumatic fever, which  
10 37 disproportionately affects global Indigenous populations and for which there is no  
11 38 diagnostic test nor effective treatment able to limit progression to rheumatic heart  
12 39 disease  
13  
14 40 • The large sample size recruited across international sites and the use of unbiased,  
15 41 comprehensive immune profiling will maximise the likelihood of being able to define  
16 42 a biomarker signature which can discriminate between ARF and other clinical  
17 43 conditions  
18  
19 44 • The most robust ‘gold standard’ rheumatic fever diagnostic process currently available  
20 45 will be used, comprising the revised 2015 Jones Criteria applied by an expert clinical  
21 46 panel  
22  
23 47 • Culturally safe processes with Indigenous governance guide the development and  
24 48 conduct of the study  
25  
26 49 • An inherent limitation is heterogeneity among people with ARF with regards to  
27 50 demographic factors, ARF type (first or recurrent), diagnostic category (possible,  
28 51 probable, definite), clinical phenotype (carditis, chorea, arthritis, skin and soft tissue)  
29 52 and timing in relation to ARF onset (variable time taken for healthcare to be reached  
30 53 after disease onset, consent gained and blood samples collected)  
31  
32  
33  
34  
35  
36  
37  
38  
39  
40 54  
41  
42  
43  
44  
45  
46  
47  
48  
49  
50  
51  
52  
53  
54  
55  
56  
57  
58  
59  
60

## 56 Introduction

57  
58 The absence of a diagnostic test for acute rheumatic fever (ARF) is a major impediment to  
59 management and epidemiological understanding of this serious childhood condition. ARF is  
60 one of the best examples of human autoimmunity caused by an infection, with Group A  
61 *Streptococcus* (GAS) the identified trigger. It is the precursor to rheumatic heart disease  
62 (RHD), a leading cause of health inequity and premature mortality for Indigenous peoples of  
63 Australia, New Zealand and internationally<sup>1</sup>. Prompt diagnosis of ARF allows timely  
64 commencement of secondary prophylaxis with long-acting penicillin to prevent repeated GAS  
65 infections that drive ARF recurrences. ARF recurrences are in turn the main mechanism  
66 responsible for development of RHD. Under-diagnosis of ARF appears to be a major  
67 contributor to the high rates of RHD in Aboriginal communities in Australia's Northern  
68 Territory (NT), where 76% of patients with RHD lack a prior ARF diagnosis<sup>2</sup>. Similarly a  
69 cohort study in New Zealand (NZ) found the majority of RHD cases (65%) had never been  
70 previously hospitalised with ARF<sup>3</sup>. Similar findings are reported in African countries.<sup>4</sup>

71  
72 The Jones Criteria (Table 1) have been the diagnostic tool for ARF for nearly 80 years<sup>5</sup>. This  
73 is a regularly-reviewed clinical algorithm, now available in a user-friendly smart device  
74 application ('app')<sup>6</sup>, most recently modified to optimise sensitivity for use in high-risk settings  
75 and optimise specificity for low-risk populations<sup>7</sup>. Despite these revisions, ARF diagnosis  
76 remains challenging and subjective. Diagnostic biomarkers for ARF that improve the  
77 performance of these criteria or provide a definitive diagnostic test would be a major advance  
78 in improving ARF detection, and thereby, RHD prevention.<sup>8</sup> Accurate case ascertainment is  
79 also needed to monitor progress towards disease control targets.

80  
81 A further barrier to ARF management is the absence of an identified effective  
82 immunomodulatory treatment to alter long-term cardiac outcomes. Non-steroidal anti-  
83 inflammatory drugs alleviate joint symptoms but do not alter the long-term disease trajectory.  
84 Corticosteroids appear ineffective in limiting development or severity of RHD<sup>9</sup>, but in some  
85 settings are prescribed as a treatment of last resort for severe carditis<sup>10,11</sup>. Hydroxychloroquine  
86 use has recently been reported in two cases of ARF with carditis, based on plausible *in vitro*  
87 data<sup>12</sup> but efficacy is as yet unknown<sup>13</sup>. Improved knowledge of ARF immune pathogenesis is  
88 needed to inform potential immune modulatory strategies targeted to the immune pathology.

1  
2 89 Compounding complexity, different pathological processes may occur, accounting for the  
3 90 heterogeneous clinical phenotypes of ARF (Table 1, see major manifestations).  
4  
5

6 91  
7  
8 92 Most investigations into the immune basis of ARF have used biased (directed) approaches,  
9  
10 93 with limited utility. For example, elevated TNF $\alpha$ , IL-6 and IL-8 have been reported in patients  
11 94 with active ARF and RHD, but are unreliable disease markers<sup>14-16</sup>. In difficult-to-diagnose  
12 95 diseases, the use of a multiplicity of biomarkers ('multivariate') to identify the presence or  
13 96 progression of disease has proven useful. Using micro-arrays, characteristic gene expression  
14 97 signatures have been reported in white blood cells from patients with Kawasaki disease  
15 98 (another inflammatory cardiac condition), lupus and tuberculosis demonstrating that  
16 99 multivariate expression profiling has potential to identify biomarker composite signatures as  
17 100 diagnostic tools<sup>17-20</sup>. Multivariate approaches to analysing biomarkers in sera or plasma have  
18 101 also shown promise. In a bead-based multiplex assay, a number of *M. tuberculosis*-reactive  
19 102 antibodies were successfully used to diagnose tuberculosis in non-human primates<sup>21</sup>, and  
20 103 antibody glycosylation patterns can discriminate latent from active TB in humans<sup>22</sup>. Most  
21 104 importantly, our recent studies show proof-of-principle for immunopathogenesis studies to  
22 105 understand ARF, identifying a dysregulated cytokine axis using multivariate approaches  
23 106 including RNAseq and flow cytometry<sup>12</sup> as well as a linked IgG3-C4 response in early ARF  
24 107 with multiplex bead-based assays<sup>23</sup>. Serum- and plasma-borne biomarkers in addition to  
25 108 transcriptional profiling and circulating cellular components thus constitute a strong and  
26 109 accessible means of diagnosis once useful biomarkers have been identified.  
27  
28  
29  
30  
31  
32  
33  
34  
35  
36  
37  
38

39 110  
40  
41 111 Our hypothesis is that unbiased, multivariate analyses hold the greatest potential for identifying  
42 112 meaningful, translatable information on the immunopathogenesis of ARF. The aims of the  
43 113 'Searching for a Technology-Driven Acute Rheumatic Fever Test' (START) study are to  
44 114 determine whether this approach can identify a biomarker signature that accurately classifies  
45 115 ARF diagnoses according to a defined 'gold standard' diagnosis (the 2015 revised Jones  
46 116 Criteria applied by a panel of clinical experts), and to better understand ARF immune  
47 117 pathogenesis (Table 2). Specifically, we aim to develop, in a discovery cohort and validate in  
48 118 a second cohort, a profile of metabolic and immunological biomarkers that distinguishes ARF  
49 119 cases from a range of non-ARF conditions and healthy controls.  
50  
51  
52  
53  
54  
55  
56  
57

58 120

## 59 121 **Methods**

1  
2 122  
34 123 **Design**

5 124 START is a cross-national, prospective, observational study with a quasi case-control design.  
6 125 We will prospectively recruit children and young adults with ARF, and people matched on age,  
7 126 sex and ethnicity who have eligible control diagnoses, in Australia and NZ. The study will  
8 127 comprise a discovery cohort (up to 65 definite cases and 65 controls) and a validation cohort  
9 128 (up to 25 definite cases and 65 controls). Probable and possible ARF diagnoses will then be  
10 129 tested independently (Figure 1). Eligible control conditions are shown in Table 2. Participants  
11 130 will have blood collected for comprehensive immune profiling.  
12 131

13 132 **Ethics and dissemination**

14 133 The study has approval from the NT Department of Health and Menzies School of Health  
15 134 Research ethics committee (18/3126) and the NZ Health and Disability Ethics Committee  
16 135 (18/CEN/197). It will be conducted according to Good Clinical Practice, Good Laboratory  
17 136 Practice and the National Health and Medical Research Council and ethical standards for  
18 137 research involving Indigenous Australians and NZ Māori and Pacific Peoples.  
19 138

20 139 Knowledge dissemination will be through academic channels and community discussion  
21 140 forums. The study team is well placed to foster translation of findings into practical tools,  
22 141 namely, an improved diagnostic, and immunomodulatory therapy.  
23 142

24 143 **Study sites**

25 144 Participating hospitals across the two international sites: Royal Darwin Hospital, Darwin, NT,  
26 145 Australia, and Starship and Middlemore Hospitals, Auckland, NZ. Clinical guidelines at all  
27 146 three study sites require that all people with suspected ARF are hospitalised for diagnostic  
28 147 workup and initiation of management<sup>10,24</sup>. Royal Darwin Hospital is the major tertiary referral  
29 148 hospital in Australia's NT. Thirty percent of the NT population is Indigenous (Aboriginal or  
30 149 Torres Strait Islander)<sup>25</sup>. ARF occurs at rates >300/100,000 total Aboriginal population in  
31 150 highest-burden communities in the NT<sup>26</sup>. Starship and Middlemore Hospitals serve a combined  
32 151 urban population of approximately 1.1 million people in the Auckland region. Māori and  
33 152 Pacific peoples make up approximately 27% of the population of greater Auckland region,  
34 153 where the incidence of ARF among Māori and Pacific children is approximately 33/100,000  
35 154 and 93/100,000, respectively, for those 5–15 years old<sup>24,27</sup>.  
36 155

## 156 **Study Participants**

157 Inclusion criteria for ARF cases are: individuals with suspected or confirmed ARF (the vast  
158 majority of whom are expected to identify as being of Aboriginal, Torres Strait Islander, Māori  
159 or Pacific ethnicity) aged 5-30 years (Darwin) or 2-20 years (NZ). Written, informed consent  
160 will be obtained from guardians or the participant themselves if aged  $\geq 16$  years in NZ or  $\geq 18$   
161 years in Australia. Differences between sites are consistent with local epidemiology and local  
162 ethical recommendations.

163

164 Exclusion criteria comprise individuals with severe anaemia in whom collection of the blood  
165 volume required for the study collection would be relatively contraindicated; profound  
166 immunosuppression other than corticosteroids for two months prior to study entry, or as  
167 appropriate depending on the half-life of the immunosuppressive agent; and unstable social  
168 situation precluding discussion about consent for research.

169

170 Controls are recruited into one of four groups: A. Non-ARF Streptococcal infections; B. Other  
171 non-ARF acute inflammatory presentations; C. Established RHD without an intercurrent acute  
172 diagnosis; and D. Healthy individuals (Table 2). All must meet the above-stated age, ethnicity  
173 and consent inclusion criteria and none of the exclusion criteria. Controls will be matched at  
174 data analysis stage to cases by site on sex, age within 10 years, and ethnicity. Individuals in  
175 Groups A, B and D will have an echocardiogram to exclude underlying RHD.

176

## 177 **Cultural safety**

178 Cultural safety<sup>28</sup> is a core underpinning principle of the study. In NZ, the research is conducted  
179 in accordance with core Te Tiriti o Waitangi principles affording protection, participation and  
180 partnership for Māori participants. Research staff enrolling participants will engage appropriate  
181 family members (in NZ: whānau) and respect differences in decision-making processes.  
182 Interpreters and translated participant materials will be used where study participants and their  
183 families primarily speak another language. In Darwin, patient information has been recorded  
184 in six Aboriginal languages. In NZ, participant materials have been translated into Te Reo  
185 Māori, Samoan and Tongan.

186

## 187 **Patient and Public Involvement**

188 The Indigenous investigators and collaborators at each site form governance groups to provide  
189 oversight of study design, conduct, reporting and dissemination. Patient and public

1  
2 190 involvement, drawing on our established consumer networks, will support knowledge  
3 191 dissemination.

4  
5 192

### 6 193 **Enrolment**

7  
8 194 It will be made clear that participation is voluntary and any benefits of participation are to  
9 195 society through knowledge advancement, rather than to the individual. Participants will be  
10 196 advised that wherever possible, blood collection for the study will coincide with collection  
11 197 done for clinical purposes, to avoid extra venepunctures. If a participant or their  
12 198 parent/guardian withdraws consent, no further samples will be collected unless a new consent  
13 199 form is signed. Participants are asked whether their blood may be stored for future use.  
14  
15 200

16  
17 201 People with suspected ARF will be enrolled as early as possible during admission, prior to a  
18 202 final diagnosis being assigned, to ensure that an acute sample is collected. A final diagnosis  
19 203 will be assigned once all required diagnostic information has become available. Participants in  
20 204 Group C (RHD) may additionally be recruited through outpatient clinics. Group D (healthy)  
21 205 will be sought from among family members and friends of other enrolled participants, or  
22 206 healthy members of the community in Darwin.  
23  
24 207

### 25 208 **Clinical data collection**

26  
27 209 After assigning a sequential study code, clinical details will be recorded on a paper Case Report  
28 210 Form (CRF) then entered into an electronic database (Medrio™ Electronic Data Capture  
29 211 System), including: date of illness onset, date of blood sample collection, demographics,  
30 212 clinical presentation, Jones criteria, clinical laboratory results, medications received and  
31 213 diagnosis assigned by the clinical treating team.  
32  
33 214

### 34 215 **Assignment of diagnosis**

35  
36 216 Patients presenting with suspected ARF may have a final diagnosis of definite ARF, probable  
37 217 ARF, possible ARF or a non-ARF condition. *Probable ARF* is defined in Australian guidelines  
38 218 as an acute presentation not fulfilling criteria, missing a major or minor criterion or lacking  
39 219 evidence of preceding streptococcal infection, but ARF is still considered the most likely  
40 220 diagnosis. *Possible ARF* applies to the same presentation type, but where ARF is considered  
41 221 uncertain but cannot be ruled out<sup>10</sup>. For this study, participants ultimately diagnosed with a non-  
42 222 ARF condition will be allocated by the clinical panel as group A or B controls.  
43  
44 223



1  
2  
3 224 Management will be directed by treating clinicians. Clinical diagnoses will be assigned  
4 225 according to local Australian and NZ Diagnostic Criteria by a panel of  $\geq 2$  study clinicians  
5  
6 226 expert in ARF. The decision on diagnostic category requires clinical judgement, after  
7  
8 227 evaluating all aspects of the case. The Jones criteria app<sup>6</sup> which provides a result of definite,  
9  
10 228 probable or possible ARF or not ARF depending on information provided to the algorithm,  
11 229 will be used by the panel at their discretion. The diagnosis of carditis will be made if rheumatic  
12  
13 230 valvulitis is evident on echocardiogram as per Jones criteria. The diagnosis of rheumatic heart  
14  
15 231 disease will be made in accordance with features described by the World Heart Federation<sup>29</sup>.  
16 232 The 2015 revised Jones Criteria<sup>7,30</sup> will be applied as the gold standard diagnostic for definite  
17  
18 233 ARF. This represents a departure from normal practice in NZ where local diagnostic criteria  
19  
20 234 differ: polyarthralgia is not considered a major criterion in NZ<sup>24</sup>. In addition to the Jones  
21  
22 235 criteria, comprehensive clinical and laboratory information such as results of synovial fluid  
23  
24 236 testing, serology for alternative infectious aetiologies, autoantibodies, radiological findings,  
25  
26 237 diagnosis assigned by the treating team, family history and local epidemiology, will be  
27  
28 238 considered in adjudicating the diagnosis. ARF type will be further specified as initial episode  
29  
30 239 or recurrence. Where the adjudication panel's diagnosis differs from that of the treating team  
31  
32 240 with implications for management, this will be communicated to the treating specialist. The  
33  
34 241 clinical panel will also assign final diagnoses for controls.

242

### 243 **Blood collection**

37 244 Blood will be collected at baseline, and for patients with ARF, on follow-up occasions during  
38  
39 245 the convalescent period as able e.g. during prolonged hospitalisation or at a later outpatient  
40  
41 246 appointment (Table 3). A safe maximum volume of 28.5 mL depending on age will be obtained  
42  
43 247 in Australia<sup>31</sup>, and 14.5 mL in NZ. Baseline samples will be collected as soon as possible during  
44  
45 248 the acute presentation, timed to coincide with routine blood testing wherever possible.  
46  
47 249 Convalescent samples will be used to determine persistence and decay of immunopathological  
48  
49 250 signatures post ARF. After collection, samples will be transported immediately to research  
50  
51 251 laboratories at Menzies School of Health Research (Australia) or the University of Auckland  
52  
53 252 (NZ) for centrifugation, serum/plasma separation and viable peripheral blood mononuclear cell  
54  
55 253 (PBMC) preparation. Timely freezing and storage of serum/plasma aliquots, PAXgene tubes  
56  
57 254 at  $-80^{\circ}\text{C}$  and PBMCs in gas-phase liquid nitrogen. Samples will be shipped periodically to  
58  
59 255 relevant laboratories.

256

### 257 **Sample size**

1  
2 258 It is not possible to predict *a priori* the combined discriminatory ability of independently  
3  
4 259 measured factors. This study has elected to enrol up to 120 ARF cases (comprising  
5  
6 260 approximately 90 definite ARF, 15 probable, 15 possible) and 130 controls (30 each of control  
7  
8 261 groups A, B and C, and 40 control group D; Figure 1 and Table 2). These numbers are feasible  
9  
10 262 and should enable characterisation of different ARF clinical phenotypes (carditis, arthritis,  
11 263 chorea, skin/soft tissue manifestations or a combination of these) and phases (first or recurrent  
12  
13 264 episodes), acknowledging heterogeneity among participants (ethnicity, age, sex; on  
14  
15 265 corticosteroids or not; at different stages of illness).

266

17  
18 267 In the multivariate approach it is expected that most, if not all, of the influential factors in the  
19  
20 268 optimal model will be significant ( $p < 0.05$ ) in univariate testing. Assuming  $\alpha$  of 5% and 95%  
21  
22 269 power ( $\beta = 0.05$ ) the minimum sample size is 26 cases. These calculations are only a guideline  
23  
24 270 for removing clear false positives, as the standard procedure for producing robust screening  
25  
26 271 models is to have a separate blinded analysis of a test subset of samples. We will utilise  
27  
28 272 Discovery and Validation Cohorts, together with stratified bootstrap cross-validation to  
29  
30 273 internally optimize the structural parameters in each model. We further used the standard  
31  
32 274 inferential approach to sample size estimation in diagnostic test studies of biomedical  
33  
34 275 informatics<sup>32</sup>. An effective multivariate predictor of ARF with positive predictive value of 0.8  
35  
36 276 (clinically useful), and a 95% confidence interval of  $\pm 0.1$ , would require 65 ARF cases in  
37  
38 277 the discovery cohort.

278

39 279 The discovery cohort will therefore comprise a target of 65 definite ARF cases and 65 controls.  
40  
41 280 The validation cohort will comprise a target of 25 definite ARF cases and 65 controls. Probable  
42  
43 281 and possible diagnoses ( $\sim 15$  in each group) will be tested independently (Figure 1). Cases will  
44  
45 282 be allocated to the discovery or validation cohorts using a computer-generated random  
46  
47 283 selection of unique study identification numbers.

284

### 285 **Laboratory methods**

50 286 The overarching aim is to develop and validate a profile of host related biomarkers that  
51  
52 287 distinguishes ARF cases from non-ARF conditions and healthy controls. This will be achieved  
53  
54 288 through the following analyses on peripheral blood samples.

289

### 290 **Immunophenotyping:**

1  
2 291 PBMC will be stained with labeled antibody panels to identify specific cell populations. Flow  
3  
4 292 cytometry raw data will be analyzed manually using Flowjo software and via an automated  
5  
6 293 gating platform as described<sup>33,34</sup>. Such high throughput, automated analysis of big flow  
7  
8 294 cytometry data offers several advantages over manual gating, including increased throughput  
9  
10 295 while increasing quality control (such as pre-processing removal of anomalous events via the  
11  
12 296 flowCut algorithm), and identification of specific cell populations with up to 50-dimensional  
13  
14 297 datasets<sup>34-36</sup>. Plasma samples will be analyzed utilizing multiplex cytokine assays to quantify  
15  
16 298 cytokine and chemokine plasma concentrations, detailed elsewhere<sup>33,37-39</sup>.

### 17 299 18 300 ***Metabolome analyses:***

19 301 Untargeted metabolomic profiling (>1000 metabolites) will be performed on plasma samples  
20  
21 302 using liquid chromatography coupled to high resolution mass-spectrometry (LC-HRMS). Data  
22  
23 303 will be acquired using three modes of operation: reverse-phase/UPLC-MS/MS with positive  
24  
25 304 ion mode electrospray ionization (ESI), reverse-phase/UPLC-MS/MS with negative ion mode  
26  
27 305 ESI, and HILIC/UPLC-MS/MS with negative ion mode ESI. All identified metabolites will be  
28  
29 306 annotated using appropriate orthogonal analytical techniques applied to the metabolite of  
30  
31 307 interest against a chemical reference standard.

### 32 308 33 309 ***Blood Transcriptomics:***

34  
35 310 RNA will be extracted from stabilized whole blood samples (PAXgene tubes) as described<sup>40,41</sup>,  
36  
37 311 libraries prepared (TruSeq Stranded Total RNA with Ribo-Zero Globin reduction, Illumina)  
38  
39 312 and NextGen sequencing undertaken (Illumina HiSeq2500, 50-bp single-end reads). Read  
40  
41 313 alignment and gene-level quantification (counts) will be performed using Hisat<sup>42</sup>. Negative  
42  
43 314 binomial models will be employed for differential expression analysis, with false discovery  
44  
45 315 rate control for multiple testing<sup>43</sup>. The analyses will be adjusted for batch effects and variations  
46  
47 316 in cellular composition, which will be estimated employing RUVSeq and CIBERSORT  
48  
49 317 respectively<sup>44,45</sup>. Genes will be mapped to blood transcriptional modules to provide a systems-  
50  
51 318 level view of the responses and reduce the dimensionality of the data<sup>46</sup>.

### 52 319 53 320 ***CD4 T cell transcriptomic responses to GAS:***

54 321 A two-phased approach will be used to examine CD4 T cell responses to GAS. Firstly, PBMCs  
55  
56 322 from a subset of definite ARF cases and healthy controls will be cultured under a variety of  
57  
58 323 conditions to identify optimal conditions for the second phase. Cells will be harvested at  
59  
60 324 multiple time points post-stimulation (6h, 24h and 48h) with heat- and antibiotic-killed ARF-

1  
2 325 associated GAS strains<sup>12,47,48</sup> and a selection of candidate ARF antigens. Total RNA from  
3  
4 326 PBMCs cultured under each condition will be profiled by RNA-Seq (Illumina 100bp paired-  
5  
6 327 end reads, 20M reads), and culture supernatants will be examined by Luminex (Bio-Plex 48-  
7  
8 328 plex Pro Human Cytokine Screening Panel) to identify optimal conditions for maximal  
9  
10 329 discrimination of responses between cases and controls. In the second phase, an expanded set  
11  
12 330 of ARF cases and controls for which PBMC samples are available will be examined following  
13  
14 331 culture under the identified, optimal conditions. Gene expression patterns and cytokine  
15  
16 332 production will be profiled by RNA-Seq and Luminex, as described above.

16 333

#### 17 334 ***Antibody analysis:***

18 335 For unbiased investigation of autoantibodies, selected sera will be screened against planer  
19  
20 336 protein microarrays comprised of over 42,000 protein fragments representing some 19,000  
21  
22 337 human proteins<sup>49</sup>. Protein fragments that are more significantly bound by autoantibodies in  
23  
24 338 ARF compared to controls will be identified using a *P*-value of >0.05 and fold change of 2.0  
25  
26 339 as cut-off. A suspension bead array will then be designed<sup>50</sup> comprised of up to 380 potential  
27  
28 340 autoantigens to assess autoantigen reactivity in all sera. The bead-antigens will be selected  
29  
30 341 based on the planar array results, previously completed screens using high-content protein  
31  
32 342 arrays<sup>51</sup>, and targets from the literature. Finally, candidate ARF autoantigens identified in the  
33  
34 343 suspension bead-array will be orthogonally validated as individual antigens in ELISA or  
35  
36 344 Luminex bead-based assays to determine sensitivity and specificity.

37 345

#### 38 346 ***Bioinformatics and statistical analyses:***

39 347 The data collected for each patient across the immune phenotyping, transcriptomic, proteomic  
40  
41 348 and metabolomic technologies will be integrated computationally to identify patterns of  
42  
43 349 covariance within and between designated clinical outcome groups. Convergence of signatures  
44  
45 350 across diverse systems biology domains will provide independent functional validation. The  
46  
47 351 use of “multi-omic” data integration techniques will also enable the possibility of deriving  
48  
49 352 novel biological information that will not be revealed in a single dataset alone.

50 353

51 354 Data integration methods applying different computational strategies will be used to explore  
52  
53 355 the complex covariance structure within and between the multi-omic data blocks. Initially,  
54  
55 356 analysis will focus on each data block in isolation employing a combination of classical  
56  
57 357 generalised linear modelling (GLM), multivariate projection regression models (PCA, PLS-  
58  
59 358 DA) and unsupervised cluster analysis. The multiple blocks will then be integrated into a single  
60

1  
2  
3 359 computational model to enable multi-omic functional mapping, which in turn will allow us to  
4 360 uncover the underlying biochemical mechanisms. Several methods for performing multi-block  
5  
6 361 data integration will be investigated, from which a consensus model will be derived. These will  
7  
8 362 include: protein–protein interaction networks using NetworkAnalyst<sup>52</sup>, Multi-block  
9  
10 363 Component Analysis<sup>53</sup>, regularized Canonical Correlation Analysis<sup>54</sup>, the Data Integration  
11  
12 364 Analysis for Biomarker discovery using Latent cOMponent (DIABLO) framework<sup>55</sup> and  
13  
14 365 Similarity Network Fusion<sup>56</sup>.

15 366

16 367 This systems biology analysis should result in both a domain-specific and domain-integrative  
17  
18 368 summary of biological phenomena that are associated with clinical outcome. Likely outcomes  
19  
20 369 are a signature biological pathway associated with ARF as well as individual candidate markers  
21  
22 370 that may provide the basis for the development of novel diagnostic tests. Furthermore, the data  
23  
24 371 generated through this effort will allow crisply defined power calculations for future narrowly  
25  
26 372 targeted assessment of potential biomarkers in clinical trials.

27 373

28 374

29 375

## 30 376 **Discussion**

31  
32  
33 377 We anticipate that study findings will provide the most comprehensive knowledge of the  
34  
35 378 immunopathogenesis of ARF to date, be used as the basis for development of a diagnostic test  
36  
37 379 and provide a pathway towards development of targeted immunomodulatory treatment(s).  
38  
39 380 START commenced recruitment in Australia in November 2018 and in NZ in May 2019.  
40  
41 381 Anticipated completion of recruitment is end-2021. Laboratory analyses will be batched and  
42  
43 382 run together at completion of recruitment.

44 383

45  
46 384 Both under-and over-diagnosis of ARF pose major challenges to individuals and health  
47  
48 385 systems.<sup>10</sup> Whether the use of the ‘probable’ and ‘possible’ ARF diagnostic categories is  
49  
50 386 reducing underdiagnosis or contributing to overdiagnosis is currently unknown. Should  
51  
52 387 findings from this study successfully identify a discriminatory biomarker profile differentiating  
53  
54 388 definite ARF from non-ARF, this will provide a mechanism for accurate diagnosis to guide  
55  
56 389 appropriate management. This will be a critically important advance in the diagnosis and  
57  
58 390 management of ARF globally.

59 391

60

1  
2 392 A minority of any population are at risk of ARF after exposure to group A streptococci. The  
3  
4 393 estimated lifetime cumulative incidence of ARF was previously calculated at 5.7% in  
5  
6 394 Australia's Northern Territory<sup>57</sup>. This was considered likely to be an under-estimate, and  
7  
8 395 indeed more recent data highlight the burden of unrecognised ARF in Aboriginal communities  
9  
10 396 in the NT where repeated infection with GAS is ubiquitous from early childhood<sup>2,58</sup>, suggesting  
11  
12 397 that the lifetime risk of ARF in these populations is higher than 6%. In US military camps, 2-  
13  
14 398 3% of recruits developed ARF after a single bout of streptococcal pharyngitis<sup>59</sup>.

15 399

16 400 Previous efforts to develop ARF diagnostic tests and elucidate the immunopathogenesis have  
17  
18 401 laid foundations for the START study design and analysis. In 2018, Kim *et al.* analysed  
19  
20 402 responses to GAS challenge of PBMC from ARF patients at Royal Darwin Hospital using  
21  
22 403 multiplex cytokine array, flow cytometric analysis, and global gene expression analysis by  
23  
24 404 RNA sequencing<sup>12</sup>. They identified a dysregulated interleukin-1 $\beta$ -granulocyte- macrophage  
25  
26 405 colony-stimulating factor (GM-CSF) cytokine axis in PBMCs from ARF patients, and the  
27  
28 406 potential to suppress this response by hydroxychloroquine. The authors proposed that  
29  
30 407 hydroxychloroquine, an immunomodulatory agent, could be repurposed to reduce the risk or  
31  
32 408 severity of RHD after ARF<sup>12</sup>. Clinical use of hydroxychloroquine, now reported as safe in two  
33  
34 409 cases<sup>13</sup>, requires further investigation. A study using sera from patients with ARF in NZ  
35  
36 410 combined multiplex bead-based assays and systems immunology data analysis to identify a  
37  
38 411 linked IgG3-C4 response that may have utility as a clinical biomarker in early ARF<sup>23</sup>. However,  
39  
40 412 small sample sizes have been a limiting factor. Key strengths of the current study include the  
41  
42 413 larger sample size, multicentre enrolment across different countries to maximise relevance, and  
43  
44 414 use of the latest laboratory approaches.

45 415

46 416 Limitations include that capture of eligible participants early in disease is challenging, due to  
47  
48 417 the variable time taken for participants to be hospitalised after disease onset, to identify and  
49  
50 418 gain consent from participants, and obtain blood samples. At the Australian site, the majority  
51  
52 419 of eligible participants will be Aboriginal children living in remote communities, often  
53  
54 420 hundreds of kilometres distant from the enrolment site. Although Auckland is a large urban  
55  
56 421 city inequitable healthcare access is experienced by many Māori and Pacific people living in  
57  
58 422 socio-economic deprivation and this can lead to delayed hospitalisation for many children  
59  
60 423 presenting with ARF. Given these inherent delays, a proportion of baseline blood samples will  
424  
425 be collected after the peak inflammatory phase has passed. Another limitation is heterogeneity  
among people with ARF with regards to ARF type (first or recurrent), diagnostic category

1  
2 426 (possible, probable, definite), clinical phenotype (carditis, chorea, arthritis etc) and  
3  
4 427 demographic variations; however, we limited enrolment to people below 30 years and only of  
5  
6 428 Aboriginal, Torres Strait Islander, Māori or Pacific ethnicity to minimize heterogeneity.  
7  
8 429 Although a distinguishing biomarker signature may be identified, the ability to readily translate  
9  
10 430 study findings into a feasible diagnostic able to be used in health service laboratories outside a  
11  
12 431 research environment, is uncertain.

13 432

14 433 Successful completion of this study will considerably improve knowledge of ARF  
15  
16 434 immunology. Innovative strategies to improve the clinical management of ARF are core  
17  
18 435 components of the overall suite of activities required to achieve the goal RHD elimination<sup>60</sup>.

1  
2  
3 437 **Acknowledgements:** We are very grateful to Caroline Motteram for project management,  
4 438 Yolanda Hernandez, Laura Francis and Vincent Mithen for recruiting participants in Darwin  
5 439 and Shirley Lawrence, Rhonda Holloway, Renee Clark, Alicia Stanley, and Roxanne Buchanan  
6 440 for recruiting participants in New Zealand. We thank Alex Kaethner and NT Cardiac for  
7 441 facilitating echocardiography. Vanessa Rigas, Erin Gargan, Gabriella Minigo and Michael  
8 442 Serralha are gratefully acknowledged for laboratory support; Kyran Kuzio, Tasha Cole, Alana  
9 443 Whitcombe, Lauren Carlton and Timothy Ho for laboratory assistance; Amy Baker and  
10 444 Rebecca Trowman for program and financial management.  
11 445

12 446 **Authors' contributions:** JRC, APR, RW, NJM, RM, AB, DB, TB, MM, GP, TK  
13 447 conceived and designed the study. NJM, RM, RMG, AB, DB, TL, TB, RB, JB, TK will perform  
14 448 the assays and analyse the data. GP and MM provide project governance. APR, RW, JY, BR,  
15 449 NW and JRC provided clinical care, patient recruitment, assessment and clinical review panel  
16 450 participation. APR create the first draft and managed the edits to the manuscript. All authors  
17 451 reviewed and approved the study protocol.  
18 452

19 453 **Funding statement:** The study is funded by the Australian National Health and Medical  
20 454 Research Council (NHMRC) grant #1147531. APR is supported by NHMRC fellowship  
21 455 #1142011. TCB is supported by the Western Australia Department of Health (#not applicable)  
22 456 and a Career Development Fellowship from Improving Health Outcomes in the Tropical North  
23 457 (NHMRC #1131932)  
24 458

25 459 **Competing interests statement.** The authors have no conflicts of interest to declare.  
26 460

27 461 **Data statement:** Not applicable. No data have been presented in this protocol paper.  
28  
29  
30  
31  
32  
33  
34  
35  
36  
37  
38  
39  
40  
41  
42  
43  
44  
45  
46  
47  
48  
49  
50  
51  
52  
53  
54  
55  
56  
57  
58  
59  
60



## Tables

### Table 1: Revised Jones Criteria

Legend: Reproduced with permission from *The 2020 Australian guideline for prevention, diagnosis and management of acute rheumatic fever and rheumatic heart disease (3rd edition)*[2]

|                                                                                          | High-risk groups†                                                                                                                                                                                                                                                                                                                                                                                                                                                                                                                                                                                                                              | Low-risk groups                                                                                                                                                             |
|------------------------------------------------------------------------------------------|------------------------------------------------------------------------------------------------------------------------------------------------------------------------------------------------------------------------------------------------------------------------------------------------------------------------------------------------------------------------------------------------------------------------------------------------------------------------------------------------------------------------------------------------------------------------------------------------------------------------------------------------|-----------------------------------------------------------------------------------------------------------------------------------------------------------------------------|
| Definite initial episode of ARF                                                          | 2 major manifestations + evidence of preceding GAS infection, OR<br>1 major + 2 minor manifestations + evidence of preceding GAS infection‡                                                                                                                                                                                                                                                                                                                                                                                                                                                                                                    |                                                                                                                                                                             |
| Definite recurrent § episode of ARF in a patient with a documented history of ARF or RHD | 2 major manifestations + evidence of preceding GAS infection, OR<br>1 major + 2 minor manifestations + evidence of preceding GAS infection‡, OR<br>3 minor manifestations + evidence of a preceding GAS infection‡                                                                                                                                                                                                                                                                                                                                                                                                                             |                                                                                                                                                                             |
| Probable or possible ARF (first episode or recurrence§)                                  | A clinical presentation in which ARF is considered a likely diagnosis but falls short in meeting the criteria by either: <ul style="list-style-type: none"> <li>• one major or one minor manifestation, OR</li> <li>• no evidence of preceding GAS infection (streptococcal titres within normal limits or titres not measured)</li> </ul> Such cases should be further categorised according to the level of confidence with which the diagnosis is made: <ul style="list-style-type: none"> <li>• Probable ARF (previously termed ‘probable: highly suspected’)</li> <li>• Possible ARF (previously termed ‘probable: uncertain’)</li> </ul> |                                                                                                                                                                             |
| Major manifestations                                                                     | Carditis (including subclinical evidence of rheumatic valvulitis on echocardiogram)<br>Polyarthritis¶ or aseptic monoarthritis or polyarthralgia<br>Sydenham chorea††<br>Erythema marginatum ‡‡<br>Subcutaneous nodules                                                                                                                                                                                                                                                                                                                                                                                                                        | Carditis (including subclinical evidence of rheumatic valvulitis on echocardiogram)<br>Polyarthritis¶<br>Sydenham chorea††<br>Erythema marginatum‡‡<br>Subcutaneous nodules |
| Minor Manifestations                                                                     | Fever §§ ≥38°C<br>Monoarthralgia ¶¶<br>ESR ≥30 mm/h or CRP ≥30 mg/L<br>Prolonged P-R interval on ECG†††                                                                                                                                                                                                                                                                                                                                                                                                                                                                                                                                        | Fever ≥38.5°C<br>Polyarthralgia or aseptic monoarthritis¶¶<br>ESR ≥60 mm/h or CRP ≥30 mg/L<br>Prolonged P-R interval on ECG†††                                              |

† High-risk groups are those living in communities with high rates of ARF (incidence >30/100,000 per year in 5–14-year-olds) or RHD (all-age prevalence >2/1000). Aboriginal and Torres Strait Islander peoples living in rural or remote settings are known to be at high risk. Data are not available for other populations but Aboriginal and Torres Strait Islander peoples living in urban settings, Māori and Pacific Islanders, and potentially immigrants from developing countries, may also be at high risk.

‡ Elevated or rising antistreptolysin O or other streptococcal antibody, or a positive throat culture or rapid antigen or nucleic acid test for GAS infection.

§ Recurrent definite, probable or possible ARF requires a time period of more than 90 days after the onset of symptoms from the previous episode of definite, probable or possible ARF

¶ A definite history of arthritis is sufficient to satisfy this manifestation. Note that if polyarthritis is present as a major manifestation, polyarthralgia or aseptic monoarthritis cannot be considered an additional minor manifestation in the same person.

†† Chorea does not require other manifestations or evidence of preceding GAS infection, provided other causes of chorea are excluded.

‡‡ Care should be taken not to label other rashes, particularly non-specific viral exanthems, as erythema marginatum.

§§ In high-risk groups, fever can be considered a minor manifestation based on a reliable history (in the absence of documented temperature) if anti-inflammatory medication has already been administered.

¶¶ If polyarthritis is present as a major criterion, monoarthritis or arthralgia cannot be considered an additional minor manifestation.

††† If carditis is present as a major manifestation, a prolonged P-R interval cannot be considered an additional minor manifestation.

CRP, C-reactive protein; ECG, electrocardiogram; ESR, erythrocyte sedimentation rate.

**Table 2: Control groups**

|                            |                                                                                                                                                                                                                                                                                                                                                                                                                                                                                                                                                                                                              |
|----------------------------|--------------------------------------------------------------------------------------------------------------------------------------------------------------------------------------------------------------------------------------------------------------------------------------------------------------------------------------------------------------------------------------------------------------------------------------------------------------------------------------------------------------------------------------------------------------------------------------------------------------|
| <b>Group A<br/>(n=50):</b> | <p>Non-ARF Streptococcal infections or toxin mediated condition or post-streptococcal condition</p> <p>Examples:</p> <ul style="list-style-type: none"> <li>- active infection with a proven or likely causative streptococcal organism (e.g. <math>\beta</math>- haemolytic streptococcus, <math>\alpha</math>-haemolytic streptococcus, <i>S. pneumoniae</i> etc) from sterile or non-sterile site</li> <li>- scarlet fever</li> <li>- acute post-streptococcal glomerulonephritis</li> </ul> <p>AND</p> <ul style="list-style-type: none"> <li>- No evidence of definite RHD on echocardiogram</li> </ul> |
| <b>Group B<br/>(n=50):</b> | <p>Other acute condition</p> <p>Examples:</p> <ul style="list-style-type: none"> <li>- inflammatory conditions, including autoimmune inflammatory conditions (e.g. lupus with arthritis), pancreatitis etc</li> <li>- infective condition: confirmed arboviral infection (eg Ross River virus), septic arthritis, bacterial endocarditis, etc</li> <li>- trauma requiring hospitalisation or operative procedure</li> </ul> <p>AND</p> <ul style="list-style-type: none"> <li>- No evidence of definite RHD on echocardiogram</li> </ul>                                                                     |
| <b>Group C<br/>(n=50):</b> | <p>RHD</p> <ul style="list-style-type: none"> <li>- Echocardiographically confirmed RHD with no active inflammation</li> </ul> <p>OR</p> <ul style="list-style-type: none"> <li>- past history of definite ARF but no current disease activity.</li> </ul>                                                                                                                                                                                                                                                                                                                                                   |
| <b>Group D<br/>(n=50):</b> | <p>Healthy</p> <ul style="list-style-type: none"> <li>- No intercurrent medical condition as determined by clinical questionnaire</li> <li>- Minor trauma allowed</li> </ul> <p>AND</p> <ul style="list-style-type: none"> <li>- No evidence of definite RHD on echocardiogram</li> </ul>                                                                                                                                                                                                                                                                                                                    |

**Table 3: Blood collection**

| <b>Australian recruitment site</b>                                  |                        |                   |                        |
|---------------------------------------------------------------------|------------------------|-------------------|------------------------|
|                                                                     | <b>Participant age</b> |                   | <b>Collection tube</b> |
| <b>Testing procedures</b>                                           | <b>5-9 years</b>       | <b>≥ 10 years</b> |                        |
| Transcriptional profiling                                           | 2.5mL                  | 2.5mL             | PaxGene tube           |
| Peripheral blood mononuclear cells for flow cytometry, Metabolomics | 4.0mL                  | 22.0mL            | Sodium Heparin         |
| Antibody studies                                                    | 4.0mL                  | 4.0mL             | Serum                  |
| <b>TOTAL</b>                                                        | 10.5mL                 | 28.5mL            |                        |
| <b>New Zealand recruitment sites</b>                                |                        |                   |                        |
|                                                                     | <b>Participant age</b> |                   | <b>Collection tube</b> |
| <b>Testing procedures</b>                                           | <b>2-10 years</b>      | <b>≥ 11 years</b> |                        |
| Transcriptional profiling                                           | 2.5mL                  | 2.5mL             | PaxGene tube           |
| Peripheral blood mononuclear cells for flow cytometry, Metabolomics | 4.0mL                  | 8.0mL             | Sodium Heparin         |
| Antibody studies                                                    | 4.0mL                  | 4.0mL             | Serum                  |
| <b>TOTAL</b>                                                        | 10.5mL                 | 14.5mL            |                        |

## References

1. Ralph AP, Read C, Johnston V, et al. Improving delivery of secondary prophylaxis for rheumatic heart disease in remote Indigenous communities: study protocol for a stepped-wedge randomised trial. *Trials* 2016;17(1):51. doi: 10.1186/s13063-016-1166-y
2. Hardie K, Ralph AP, de Dassel JL. RHD elimination: action needed beyond secondary prophylaxis. *Aust N Z J Public Health* 2020;44(5):427. doi: 10.1111/1753-6405.13002 [published Online First: 2020/06/09]
3. Oliver J, Robertson O, Zhang J, et al. Progression of Acute Rheumatic Fever to Recurrence, Rheumatic Heart Disease, and Death in New Zealand Children and Youth: A Cohort Study. *Heart, Lung and Circulation* 2019;28
4. Zuhlke L, Engel ME, Karthikeyan G, et al. Characteristics, complications, and gaps in evidence-based interventions in rheumatic heart disease: the Global Rheumatic Heart Disease Registry (the REMEDY study). *European heart journal* 2015;36(18):1115-22a. doi: 10.1093/eurheartj/ehu449
5. Jones TD. The diagnosis of rheumatic fever. *J Am Med Assoc* 1944;126:481-84.
6. RHD Australia. iPhone and Android Apps. <http://www.rhdaustralia.org.au/apps> 2020 [14 August 2014].
7. Gewitz MH, Baltimore RS, Tani LY, et al. Revision of the Jones Criteria for the diagnosis of acute rheumatic fever in the era of Doppler echocardiography: a scientific statement from the American Heart Association. *Circulation* 2015;131(20):1806-18. doi: 10.1161/CIR.0000000000000205
8. McMillan DJ, Rafeek RAM, Norton RE, et al. In Search of the Holy Grail: A Specific Diagnostic Test for Rheumatic Fever. *Front Cardiovasc Med* 2021;8:674805. doi: 10.3389/fcvm.2021.674805
9. Cilliers A, Adler AJ, Saloojee H. Anti-inflammatory treatment for carditis in acute rheumatic fever. *Cochrane database of systematic reviews* 2015(5):CD003176. doi: 10.1002/14651858.CD003176.pub3
10. RHD Australia (ARF/RHD writing group). The 2020 Australian guideline for prevention, diagnosis and management of acute rheumatic fever and rheumatic heart disease (3rd edition) <https://www.rhdaustralia.org.au/arf-rhd-guideline>. Menzies School of Health Research, 2020.
11. Dean GL, Edwards SG, Ives NJ, et al. Treatment of tuberculosis in HIV-infected persons in the era of highly active antiretroviral therapy. *Aids* 2002;16(1):75-83.
12. Kim ML, Martin WJ, Minigo G, et al. Dysregulated IL-1beta-GM-CSF Axis in Acute Rheumatic Fever That Is Limited by Hydroxychloroquine. *Circulation* 2018;138(23):2648-61. doi: 10.1161/CIRCULATIONAHA.118.033891 [published Online First: 2018/12/21]
13. Wilson NJ, Concannon A, Malcolm J, et al. The Treatment of Acute Rheumatic Fever: Novel Use of Hydroxychloroquine. *Pediatr Infect Dis J* 2020 doi: 10.1097/INF.0000000000002647 [published Online First: 2020/03/30]
14. M. Hafez M, EL-Morsy Z, EL-Shennawy F, et al. Susceptibility to Over Production of Cytokines in Acute Rheumatic Carditis and Their Role in the Pathogenesis. *Journal of Medical Sciences* 2002 doi: 10.3923/jms.2002.65.73
15. Yegin O, Coskun M, Ertug H. Cytokines in acute rheumatic fever. *Eur J Pediatr* 1997;156(1):25-9. doi: 10.1007/s004310050545 [published Online First: 1997/01/01]
16. Narin N, Kutukculer N, Narin F, et al. Anticardiolipin antibodies in acute rheumatic fever and chronic rheumatic heart disease: is there a significant association? *Clin Exp Rheumatol* 1996;14(5):567-9. [published Online First: 1996/09/01]

17. Wright VJ, Herberg JA, Kaforou M, et al. Diagnosis of Kawasaki Disease Using a Minimal Whole-Blood Gene Expression Signature. *JAMA Pediatr* 2018;172(10):e182293. doi: 10.1001/jamapediatrics.2018.2293 [published Online First: 2018/08/08]
18. Berry MP, Graham CM, McNab FW, et al. An interferon-inducible neutrophil-driven blood transcriptional signature in human tuberculosis. *Nature* 2010;466(7309):973-7. doi: 10.1038/nature09247 [published Online First: 2010/08/21]
19. Bennett L, Palucka AK, Arce E, et al. Interferon and granulopoiesis signatures in systemic lupus erythematosus blood. *J Exp Med* 2003;197(6):711-23. doi: 10.1084/jem.20021553 [published Online First: 2003/03/19]
20. Anderson ST, Kaforou M, Brent AJ, et al. Diagnosis of childhood tuberculosis and host RNA expression in Africa. *N Engl J Med* 2014;370(18):1712-23. doi: 10.1056/NEJMoa1303657
21. Khan IH, Ravindran R, Yee J, et al. Profiling antibodies to Mycobacterium tuberculosis by multiplex microbead suspension arrays for serodiagnosis of tuberculosis. *Clinical and vaccine immunology : CVI* 2008;15(3):433-8. doi: 10.1128/CVI.00354-07 [published Online First: 2007/12/14]
22. Lu LL, Chung AW, Rosebrock TR, et al. A Functional Role for Antibodies in Tuberculosis. *Cell* 2016;167(2):433-43 e14. doi: 10.1016/j.cell.2016.08.072 [published Online First: 2016/09/27]
23. Chung AW, Ho TK, Hanson-Manful P, et al. Systems immunology reveals a linked IgG3-C4 response in patients with acute rheumatic fever. *Immunol Cell Biol* 2020;98(1):12-21. doi: 10.1111/imcb.12298 [published Online First: 2019/11/20]
24. Heart Foundation of New Zealand. New Zealand Guidelines for Rheumatic Fever: Diagnosis, Management and Secondary Prevention of Acute Rheumatic Fever and Rheumatic Heart Disease: 2014 Update. <https://www.heartfoundation.org.nz/resources/acute-rheumatic-fever-and-rheumatic-heart-disease-guideline>, 2014.
25. Australian Bureau of Statistics. Estimates of Aboriginal and Torres Strait Islander Australians 2016 [Available from: <https://www.abs.gov.au/ausstats/abs@.nsf/mf/3238.0.55.001> accessed 27 April 2020.
26. Francis J, R, , Gargan C, Remenyi B, et al. A cluster of acute rheumatic fever cases among Aboriginal Australians in a remote community with high baseline incidence. *Aust N Z J Public Health* 2019;4(3):288-93.
27. Institute of Environmental Science and Research Limited. Rheumatic fever report, January-December 2018. EpiSurv Science for Communities [https://surv.esr.cri.nz/PDF\\_surveillance/RheumaticFever/Rheumaticfeverbi-annualreportJan-Dec2018.pdf](https://surv.esr.cri.nz/PDF_surveillance/RheumaticFever/Rheumaticfeverbi-annualreportJan-Dec2018.pdf). 2018
28. Curtis E, Jones R, Tipene-Leach D, et al. Why cultural safety rather than cultural competency is required to achieve health equity: a literature review and recommended definition. *International journal for equity in health* 2019;18(1):174.
29. Remenyi B, Wilson N, Steer A, et al. World Heart Federation criteria for echocardiographic diagnosis of rheumatic heart disease--an evidence-based guideline. *Nature reviews Cardiology* 2012;9(5):297-309. doi: 10.1038/nrcardio.2012.7
30. Beaton A, Carapetis J. The 2015 revision of the Jones criteria for the diagnosis of acute rheumatic fever: implications for practice in low-income and middle-income countries. *Heart Asia* 2015;7(2):7-11. doi: 10.1136/heartasia-2015-010648 [published Online First: 2015/01/01]
31. Seattle Children's Hospital. Maximum Allowable Blood Draw From Infants. Mayo Foundation for Medical Education and Research 2020 [28 April 2020]. Available from: <https://seattlechildrenslab.testcatalog.org/show/1000721-1>.

- 1
- 2
- 3 32. Hajian-Tilaki K. Sample size estimation in diagnostic test studies of biomedical
- 4 informatics. *J Biomed Inform* 2014;48:193-204. doi: 10.1016/j.jbi.2014.02.013
- 5 [published Online First: 2014/03/04]
- 6 33. Ben-Othman R, Cai B, Liu AC, et al. Systems Biology Methods Applied to Blood and
- 7 Tissue for a Comprehensive Analysis of Immune Response to Hepatitis B Vaccine in
- 8 Adults. *Frontiers in immunology* 2020;11:580373. doi: 10.3389/fimmu.2020.580373
- 9 [published Online First: 2020/12/01]
- 10 34. Rahim A, Meskas J, Drissler S, et al. High throughput automated analysis of big flow
- 11 cytometry data. *Methods* 2018;134-135:164-76. doi: 10.1016/j.ymeth.2017.12.015
- 12 [published Online First: 2017/12/31]
- 13 35. Malek M, Taghiyar MJ, Chong L, et al. flowDensity: reproducing manual gating of flow
- 14 cytometry data by automated density-based cell population identification.
- 15 *Bioinformatics* 2015;31(4):606-7. doi: 10.1093/bioinformatics/btu677 [published
- 16 Online First: 2014/11/08]
- 17 36. Ge Y, Sealfon SC. flowPeaks: a fast unsupervised clustering for flow cytometry data via
- 18 K-means and density peak finding. *Bioinformatics* 2012;28(15):2052-8. doi:
- 19 10.1093/bioinformatics/bts300 [published Online First: 2012/05/19]
- 20 37. Amenyogbe N, Dimitriu P, Cho P, et al. Innate Immune Responses and Gut Microbiomes
- 21 Distinguish HIV-Exposed from HIV-Unexposed Children in a Population-Specific
- 22 Manner. *J Immunol* 2020;205(10):2618-28. doi: 10.4049/jimmunol.2000040
- 23 [published Online First: 2020/10/18]
- 24 38. Amenyogbe N, Dimitriu P, Smolen KK, et al. Biogeography of the Relationship between
- 25 the Child Gut Microbiome and Innate Immune System. *mBio* 2021;12(1) doi:
- 26 10.1128/mBio.03079-20 [published Online First: 2021/01/14]
- 27 39. Moncunill G, Dobano C, Gonzalez R, et al. Association of Maternal Factors and HIV
- 28 Infection With Innate Cytokine Responses of Delivering Mothers and Newborns in
- 29 Mozambique. *Front Microbiol* 2020;11:1452. doi: 10.3389/fmicb.2020.01452
- 30 [published Online First: 2020/08/09]
- 31 40. Lee AH, Shannon CP, Amenyogbe N, et al. Dynamic molecular changes during the first
- 32 week of human life follow a robust developmental trajectory. *Nat Commun*
- 33 2019;10(1):1092. doi: 10.1038/s41467-019-08794-x [published Online First:
- 34 2019/03/14]
- 35 41. Idoko OT, Smolen KK, Wariri O, et al. Clinical Protocol for a Longitudinal Cohort Study
- 36 Employing Systems Biology to Identify Markers of Vaccine Immunogenicity in
- 37 Newborn Infants in The Gambia and Papua New Guinea. *Front Pediatr* 2020;8:197.
- 38 doi: 10.3389/fped.2020.00197 [published Online First: 2020/05/20]
- 39 42. Perteau M, Kim D, Perteau GM, et al. Transcript-level expression analysis of RNA-seq
- 40 experiments with HISAT, StringTie and Ballgown. *Nat Protoc* 2016;11(9):1650-67.
- 41 doi: 10.1038/nprot.2016.095 [published Online First: 2016/08/26]
- 42 43. Anders S, McCarthy DJ, Chen Y, et al. Count-based differential expression analysis of
- 43 RNA sequencing data using R and Bioconductor. *Nat Protoc* 2013;8(9):1765-86. doi:
- 44 10.1038/nprot.2013.099 [published Online First: 2013/08/27]
- 45 44. Risso D, Ngai J, Speed TP, et al. Normalization of RNA-seq data using factor analysis of
- 46 control genes or samples. *Nat Biotechnol* 2014;32(9):896-902. doi: 10.1038/nbt.2931
- 47 [published Online First: 2014/08/26]
- 48 45. Newman AM, Liu CL, Green MR, et al. Robust enumeration of cell subsets from tissue
- 49 expression profiles. *Nat Methods* 2015;12(5):453-7. doi: 10.1038/nmeth.3337
- 50 [published Online First: 2015/03/31]
- 51 46. Li S, Roupheal N, Duraisingham S, et al. Molecular signatures of antibody responses
- 52 derived from a systems biology study of five human vaccines. *Nat Immunol*
- 53 2014;15(2):195-204. doi: 10.1038/ni.2789 [published Online First: 2013/12/18]
- 54
- 55
- 56
- 57
- 58
- 59
- 60

- 1  
2  
3 47. Smoot JC, Barbian KD, Van Gompel JJ, et al. Genome sequence and comparative  
4 microarray analysis of serotype M18 group A Streptococcus strains associated with  
5 acute rheumatic fever outbreaks. *Proceedings of the National Academy of Sciences of*  
6 *the United States of America* 2002;99(7):4668-73. doi: 10.1073/pnas.062526099  
7 [published Online First: 2002/03/28]
- 8 48. Bryant PA, Smyth GK, Gooding T, et al. Susceptibility to acute rheumatic fever based on  
9 differential expression of genes involved in cytotoxicity, chemotaxis, and apoptosis.  
10 *Infect Immun* 2014;82(2):753-61. doi: 10.1128/IAI.01152-13 [published Online First:  
11 2014/01/31]
- 12 49. Sjoberg R, Mattsson C, Andersson E, et al. Exploration of high-density protein  
13 microarrays for antibody validation and autoimmunity profiling. *N Biotechnol*  
14 2016;33(5 Pt A):582-92. doi: 10.1016/j.nbt.2015.09.002 [published Online First:  
15 2015/09/30]
- 16 50. Just D, Manberg A, Mitsios N, et al. Exploring autoantibody signatures in brain tissue  
17 from patients with severe mental illness. *Transl Psychiatry* 2020;10(1):401. doi:  
18 10.1038/s41398-020-01079-8 [published Online First: 2020/11/20]
- 19 51. McGregor R, Tay ML, Carlton LH, et al. Mapping Autoantibodies in Children With  
20 Acute Rheumatic Fever. *Frontiers in immunology* 2021;12:702877. doi:  
21 10.3389/fimmu.2021.702877 [published Online First: 2021/08/03]
- 22 52. Xia J, Gill EE, Hancock RE. NetworkAnalyst for statistical, visual and network-based  
23 meta-analysis of gene expression data. *Nat Protoc* 2015;10(6):823-44. doi:  
24 10.1038/nprot.2015.052 [published Online First: 2015/05/08]
- 25 53. De Roover K, Ceulemans E, Timmerman ME. How to perform multiblock component  
26 analysis in practice. *Behav Res Methods* 2012;44(1):41-56. doi: 10.3758/s13428-011-  
27 0129-1 [published Online First: 2011/07/13]
- 28 54. Wilms I, Croux C. Robust sparse canonical correlation analysis. *BMC Syst Biol*  
29 2016;10(1):72. doi: 10.1186/s12918-016-0317-9 [published Online First: 2016/08/16]
- 30 55. Singh A, Shannon CP, Gautier B, et al. DIABLO: an integrative approach for identifying  
31 key molecular drivers from multi-omics assays. *Bioinformatics* 2019;35(17):3055-62.  
32 doi: 10.1093/bioinformatics/bty1054 [published Online First: 2019/01/19]
- 33 56. Wang B, Mezlini AM, Demir F, et al. Similarity network fusion for aggregating data  
34 types on a genomic scale. *Nat Methods* 2014;11(3):333-7. doi: 10.1038/nmeth.2810  
35 [published Online First: 2014/01/28]
- 36 57. Carapetis JR, Currie BJ, Mathews JD. Cumulative incidence of rheumatic fever in an  
37 endemic region: a guide to the susceptibility of the population? *Epidemiol Infect*  
38 2000;124(2):239-44. [published Online First: 2000/05/17]
- 39 58. Francis JR, Fairhurst H, Hardefeldt H, et al. Hyperendemic rheumatic heart disease in a  
40 remote Australian town identified by echocardiographic screening. *Med J Aust*  
41 2020;213(3):118-23. doi: 10.5694/mja2.50682 [published Online First: 2020/07/08]
- 42 59. Rammelkamp CH, Wannamaker LW, Denny FW. The Epidemiology and Prevention of  
43 Rheumatic Fever. *Bull N Y Acad Med* 1952;28(5):321-34. [published Online First:  
44 1952/05/01]
- 45 60. Wyber R, Noonan K, Halkon C, et al. Ending rheumatic heart disease in Australia: the  
46 evidence for a new approach. *Med J Aust* 2020;213 Suppl 10:S3-S31. doi:  
47 10.5694/mja2.50853 [published Online First: 2020/11/16]
- 48  
49  
50  
51  
52  
53  
54  
55  
56  
57  
58  
59  
60

1  
2  
3 **Figures**

4 **Figure 1: Study diagram showing target sample sizes**

5 ARF = acute rheumatic fever; RHD = rheumatic heart disease  
6  
7  
8  
9  
10  
11  
12  
13  
14  
15  
16  
17  
18  
19  
20  
21  
22  
23  
24  
25  
26  
27  
28  
29  
30  
31  
32  
33  
34  
35  
36  
37  
38  
39  
40  
41  
42  
43  
44  
45  
46  
47  
48  
49  
50  
51  
52  
53  
54  
55  
56  
57  
58  
59  
60

For peer review only



1  
2  
3  
4  
5  
6  
7  
8  
9  
10  
11  
12  
13  
14  
15  
16  
17  
18  
19  
20  
21  
22  
23  
24  
25  
26  
27  
28  
29  
30  
31  
32  
33  
34  
35  
36  
37  
38  
39  
40  
41  
42  
43  
44  
45  
46  
47  
48  
49  
50  
51  
52  
53  
54  
55  
56  
57  
58  
59  
60

ENROLMENT AND DIAGNOSIS



ANALYSES



Supplement: bmjopen-2021-053720.draft_revisions.pdf [file bmjopen-2021-053720.draft_revisions.pdf]
