# Supplementary material for: Searching for a technology-driven acute rheumatic fever test: the START study protocol
Source: PubMed Central journal article supplement — BMJ Open. 2021 Sep 15;11(9):e053720. doi: 10.1136/bmjopen-2021-053720 (PMC8444258; doi:10.1136/bmjopen-2021-053720), 2021-09-15
Supplement: bmjopen-2021-053720.reviewer_comments.pdf [file bmjopen-2021-053720.reviewer_comments.pdf]

## PEER REVIEW HISTORY

BMJ Open publishes all reviews undertaken for accepted manuscripts. Reviewers are asked to complete a checklist review form (<http://bmjopen.bmj.com/site/about/resources/checklist.pdf>) and are provided with free text boxes to elaborate on their assessment. These free text comments are reproduced below.

## ARTICLE DETAILS

|                            |                                                                                                                                                                                                                                                                              |
|----------------------------|------------------------------------------------------------------------------------------------------------------------------------------------------------------------------------------------------------------------------------------------------------------------------|
| <b>TITLE (PROVISIONAL)</b> | Searching for a Technology-Driven Acute Rheumatic Fever Test: the START study protocol                                                                                                                                                                                       |
| <b>AUTHORS</b>             | Ralph, A; Webb, Rachel; Moreland, Nikki; McGregor, Reuben; Bosco, Anthony; Broadhurst, David; Lassmann, Timo; Barnett, Timothy; Benothman, Rym; Yan, Jennifer; Remenyi, Bo; Bennett, Julie; Wilson, Nigel; Mayo, Mark; Pearson, Glenn; Kollmann, Tobias; Carapetis, Jonathan |

This article was not externally reviewed at BMJ Open. Protocols that have been independently assessed prior to submission to BMJ Open are usually fast-tracked to publication on the grounds that further substantial changes will not be possible. This independent assessment will usually be external, independent review for both a substantial grant award from a non-commercial or government funder and ethics approval.
